1 **Top-down feedback enables flexible coding strategies in**  
2 **olfactory cortex**

3

4 Zhen Chen <sup>1</sup>, Krishnan Padmanabhan <sup>2</sup>

5 1. Department of Brain and Cognitive Sciences, University of Rochester,

6 Rochester, NY 14627;

7 2. Department of Neuroscience, University of Rochester School of Medicine and

8 Dentistry, Rochester, NY 14642.

9

10

11

## 12 **Highlights**

- 13 • Centrifugal feedback shapes the temporal structure of neuronal firing in  
14 piriform cortical cells
- 15 • Feedback controls information to piriform cortex by restructuring the ratio  
16 of excitatory and inhibitory synaptic inputs in the bulb
- 17 • Centrifugal feedback restructures how identity and timing of glomerular  
18 activity is represented in temporal patterns of activity in piriform cortex
- 19 • Temporal information improves behavioral performance in accuracy and  
20 reaction time of odor discrimination

21 **Summary**

22 In chemical sensation, multiple models have been proposed to explain how  
23 odors are represented by patterns of neuronal activity in the olfactory cortex. One  
24 hypothesis is that the identity of combinations of active neurons within specific  
25 sniff-related time windows are critical for encoding information about odors.  
26 Another model is that patterns of neural activity evolve across time and it is this  
27 temporal structure that is essential for encoding odor information. Interestingly,  
28 we found that top-down feedback to the olfactory bulb dictates what information is  
29 transmitted to the olfactory cortex by switching between these two strategies.  
30 Using a detailed model of the early olfactory system, we demonstrate that  
31 feedback control of inhibitory granule cells in the main olfactory bulb influences the  
32 balance between excitatory and inhibitory synaptic currents in mitral cells, thereby  
33 restructuring the firing patterns of piriform cortical cells across time. This resulted  
34 in performance gains in both the accuracy and reaction time of odor discrimination  
35 tasks. These findings lead us to propose a new framework for early olfactory  
36 computation, one in which top-down feedback to the bulb flexibly controls the  
37 temporal structure of neural activity in olfactory cortex, allowing the early olfactory  
38 system to dynamically switch between two distinct models of coding.

39

## 40 **Introduction**

41 Sensory information is encoded in the spiking activity of populations of neurons.  
42 An open question is what aspects of this spiking neural activity convey stimulus  
43 information (encoding) and how neurons at later processing stages read out this  
44 information (decoding) (Paninski et al., 2007). In the olfactory system for example,  
45 one model of neural coding posits that the temporal patterns of principal neurons  
46 in the main olfactory bulb (MOB) are relayed to and encoded for in the olfactory  
47 cortex, and this timing is critical for odor representation (Chong and Rinberg, 2018;  
48 Haddad et al., 2013; Laurent, 2002). By contrast, another model has proposed  
49 that these temporal patterns across the principal neurons of MOB are transformed  
50 into combinatorial patterns of activity in the olfactory piriform cortex. Within  
51 discrete time windows related to a sniff cycle, this combinatorial code provides  
52 information about odor identity and concentration, serving as the neural basis for  
53 olfactory encoding (Bolding and Franks, 2017; Stern et al., 2018; Stettler and Axel,  
54 2009). Each model has experimental support and draws upon theoretical  
55 frameworks that make them appealing, but it remains unclear how these models  
56 may be used in different behavioral contexts, and the extent to which they are  
57 instantiations of an overarching framework of computing.

58 Much of what is understood about the neural coding for volatile chemicals  
59 comes from studies dissecting early olfactory circuits in rodents. Volatile  
60 molecules bind to olfactory receptor neurons (ORNs) in the nasal epithelium, with  
61 the firing of ORNs encoding the identity and the concentration of odors (Buck and  
62 Axel, 1991; Malnic et al., 1999). Each ORN expresses one of ~1500 odorant  
63 receptors, and the axons of these ORNs converge onto one to two dense neuropil  
64 structures called glomeruli in MOB (Mombaerts et al., 1996). The mitral/tufted cells  
65 (M/T cells) are the main output neurons of MOB and receive direct excitatory input  
66 from ORNs via their apical dendrites at a single glomerulus. Each odorant  
67 activates a unique subset of glomeruli with different onset latencies, which in turn  
68 gives rise to odor-specific patterns of M/T cells (Bathellier et al., 2008; Cury and  
69 Uchida, 2010; Paoli et al., 2018; Spors and Grinvald, 2002). As a result,  
70 ensembles of activated M/T cells vary in both the identity (which cells fire) and  
71 timing (when they fire), a code described as spatiotemporal (Uchida et al., 2014).

72 Although the temporal dynamics of M/T firings have been extensively  
73 observed in MOB (Baker et al., 2019; Gire et al., 2013a; Shusterman et al., 2011),  
74 it remains an open question if and how downstream neurons read out these  
75 temporal patterns from the MOB. M/T cell axons project to the olfactory piriform  
76 cortex without apparent spatial organization (Sosulski et al., 2011), such that each  
77 piriform cortical cell receives input from multiple activated glomeruli (Davison and  
78 Ehlers, 2011). As animals actively sample their environment, sniffing acts as a  
79 metronome organizing both the timing and sequence of odor-evoked responses of  
80 M/T cells being relayed to the piriform cortex (Bathellier et al., 2008; Shusterman  
81 et al., 2011). Interestingly, although the M/T cell activity can occur throughout the  
82 sniff cycle, some studies have shown that responses of piriform cortical cells have  
83 much narrower windows of activity, often occurring as a transient burst of spikes  
84 shortly after the onset of inhalation (Bolding and Franks, 2017; Miura et al., 2012).

85 This timing is controlled by intracortical inhibition, which suppresses the activity of  
86 piriform cortical cells following an initial transient burst correlated with the activation  
87 of the earliest glomeruli. Consequently, piriform cortical cells are largely  
88 unresponsive to M/T cell input from the glomeruli that are activated later in the sniff  
89 (Bolding and Franks, 2017; Miura et al., 2012; Stern et al., 2018). The  
90 combinational pattern of activated piriform cells within that transient burst is  
91 sufficient to represent odor identity during discrete windows of opportunity (Bolding  
92 and Franks, 2017; Gire et al., 2013b). Such a framework suggests that the  
93 temporal information that represents odors in MOB is transformed into a  
94 combinatorial pattern of piriform cells. Studies have identified both the behavioral  
95 readouts (Chong and Rinberg, 2018; Wilson et al., 2017) and the circuit  
96 mechanisms (Bolding and Franks, 2018; Stern et al., 2018) that support this  
97 combinatorial/ensemble code in piriform cortex.

98 Several predictions fall from this model of olfactory coding. First, piriform  
99 cells should not be sensitive to the differences in the timing of successively later  
100 activated glomeruli. Second, animal behaviors should be less sensitive to the  
101 patterns of activity of later glomeruli, since piriform cortex is involved in establishing  
102 odor perception and odor decision-making (Gire et al., 2013b; Mori and Sakano,  
103 2021). Recently, both physiological and behavioral studies have challenged these  
104 predictions. For example, in transgenic mice expressing channelrhodopsin-2 in  
105 ORNs, varying the stimulation timing of two spots corresponding to two different  
106 glomeruli on the dorsal surface of MOB triggers different responses in both the  
107 identity and timing of piriform cortical cells (Haddad et al., 2013). Thus, some  
108 temporal structure of glomerular activation is preserved in the activity of piriform  
109 cortical cells. Recent behavioral studies in mice also show that animals can report  
110 differences in the relative timing in glomerular activation (Ackels et al., 2021;  
111 Chong et al., 2020; Rebello et al., 2014; Smear et al., 2011). As a result,  
112 information encoded in the temporal structure of glomerular activity is still available  
113 to the piriform cortex, and that animals can use these differences in piriform cortical  
114 cell activity to guide their behavior. However, it remains unknown how the circuitry  
115 within and between MOB and piriform cortex implement these computations. and  
116 Are these different results indicative of computations implemented by different  
117 circuits? Do different behaviors activate different networks in the early olfactory  
118 system, and is it this difference that leads to these different results? Or is it some  
119 combination of both?

120 One clue is that nearly all of these studies have focused on the feedforward  
121 projections from the MOB to the piriform cortex. Accumulating evidence has  
122 shown that some of the largest inputs to the granule cells of the bulb come from  
123 piriform cortex, which sends centrifugal projections back to MOB (Boyd et al.,  
124 2012; Chen and Padmanabhan, 2020; Oswald and Urban, 2012; Otazu et al.,  
125 2015; Padmanabhan et al., 2016, 2019; Shipley and Adamek, 1984). Could  
126 different findings on how piriform cortex codes for odor information be reconciled  
127 by examining the role of feedback from piriform cortex to the bulb? To test this,  
128 we built a realistic spiking neuronal network model that recapitulated the circuit  
129 architecture within and between MOB and piriform cortex and studied how

130 centrifugal feedback influenced odor information encoded by the piriform cell  
131 population. We hypothesized that different experiments might engage centrifugal  
132 feedback in different ways (because of/owing to behavioral training, the kind of  
133 odor discrimination or detection task that the animals are being asked to perform,  
134 etc.). These differences in the weight of centrifugal feedback to MOB could then  
135 determine how much odor information is conveyed by the temporal patterns of  
136 MOB input. In studying this network, we found that centrifugal feedback allowed  
137 the timing of glomerular activation to be represented in the dynamics of piriform  
138 cortical cells and enabled piriform cortex to enhance odor information gained from  
139 the spatiotemporal patterns of MOB input. Furthermore, a model of decision  
140 making (called the sequential probability ratio test) revealed that the information  
141 gain in piriform cortex could improve behavioral performance in an odor  
142 discrimination task, a result that linked neural coding to behavior. Together, our  
143 results show that feedback projections allow differences in glomerular identity and  
144 timing to be encoded for in the temporal patterns of piriform cortical cells. We  
145 propose that feedback serves to flexibly sculpt the temporal organization of piriform  
146 cortical cell activity to change between combinatorial and temporal codes based  
147 on the animal's behavioral demands and the information available about the odors.  
148 Different amount of feedback control could be related to differences the animal's  
149 internal state (arousal, attention, etc.), learning, and memory.

150

## 151 **Results**

### 152 **Odors activate distinct spatiotemporal patterns of glomeruli.**

153 To understand the functional role of centrifugal feedback from piriform cortex (PCx)  
154 to the main olfactory bulb (MOB) in shaping the temporal structure of olfactory  
155 coding, we built a spiking neuronal network model that recapitulated the circuit  
156 architecture of both the MOB and the PCx (Fig.1A, STAR Methods). Our model  
157 captured essential features of the early olfactory system's architecture, including  
158 the predominance of inhibitory granule cells (GCs) in the bulb (outnumbering M/T  
159 cells 10 to 1), the distributed connections between M/T cells and GCs, the random  
160 projections of M/T cells to the piriform cortex, the local inhibitory populations in the  
161 cortex and feedback from the piriform cortex to the bulb. Additionally, we matched  
162 the biophysical properties of all the cells throughout the circuit including such  
163 features as M/T biophysical diversity (STAR Methods) and glomerulus-specific  
164 long latency inhibition of granule cells (Fig.S1) based on previous experimental  
165 findings (Kapoor and Urban, 2006; Padmanabhan and Urban, 2014; Soucy et al.,  
166 2009). A schematic illustration of the network architecture was shown in Fig.1A  
167 which allowed us to build a model to investigate the role of centrifugal processing  
168 in olfaction (STAR Methods).

169 Next, we defined a time window corresponding to a single sniff, that was  
170 both ethologically and behaviorally relevant, and allowed us to study the dynamics  
171 of this network in both the MOB and PCx (Rinberg et al., 2006; Uchida and  
172 Mainen, 2003; Wesson et al., 2008). Model odors presented during a 250ms  
173 window (corresponding to a 4Hz sniff) were designed to match the activation

174 patterns of glomeruli by odorants, both in term of the identity (5~6% of all glomeruli)  
175 and timing (different onset latencies and durations) (Vincis et al., 2012). Neural  
176 responses of all the cells in the network were then simulated to study the effects  
177 of feedback on the dynamics of the bulb and the cortex.

178         Once activated, all the M/T cells associated with that glomerulus received  
179 correlated ORN input that subsequently decayed over time (Fig.1B and Fig.S2).  
180 The earliest glomerulus provided the strongest drive to the M/T cells, consistent  
181 with previous studies (Johnson and Leon, 2007; Soucy et al., 2009; Wachowiak  
182 and Cohen, 2001). Odors could thus be defined by the combinatorial pattern of  
183 the activated glomeruli (*identity*) and their onset latencies (*timing*) (Fig.1C1 and  
184 Fig.1D1), recapitulating the spatiotemporal structure of glomerular responses to  
185 natural odors (Meister and Bonhoeffer, 2001; Rubin and Katz, 1999). For example,  
186 the two representative odors in Fig.1B differed in the identity of the earliest  
187 glomerulus as well as the timing of the third glomerulus. We generated 300 total  
188 model odors to capture some of the diversity of activation patterns of glomeruli.  
189 Although most odor pairs (>80%) were weakly anti-correlated due to the  
190 sparseness of glomerular activation, we identified numerous examples of strongly  
191 correlated pairs (Fig.1C2 and Fig.1D2) corresponding to distinct odors that had  
192 large overlap in both the identify and timing of glomerular activation. The  
193 correlation coefficients between pairs of odors ( $n = 44,850$ ) spanned the range  
194 from  $-0.1$  to  $0.9$  (Fig.1C3 and Fig.1D3), covering a complete range of input  
195 similarities. This allowed us to dissect how the circuits of the MOB, PCx, and  
196 centrifugal connections between them affected the neural representations of these  
197 different odors.

198

### 199 **Centrifugal feedback modulates the output of MOB via granule cells.**

200 Previous studies have shown that centrifugal feedback can impact olfactory bulb  
201 activity via the granule cell population (Boyd et al., 2012; Markopoulos et al., 2012).  
202 To understand the functional role of this centrifugal feedback in modulating the  
203 output of MOB, we modeled a silencing experiment by simulating the dynamics of  
204 MOB neurons when the centrifugal synaptic weights to GCs were set to zero,  
205 versus when centrifugal feedback from PCx corresponded to weights measured in  
206 experiments. As only the top-down connections from PCx to MOB were silenced  
207 in our experiments, all other network connectivity including the local excitatory and  
208 inhibitory synapses in either area was preserved. Such an approach allowed us  
209 to evaluate the input-specific relationship between feedback and activity in much  
210 the same way that a pharmacological inactivation or optogenetic silencing  
211 experiment may have been done.

212         In response to one example model odor (Odor-1 in Fig,1B), the M/T  
213 population firing rate increased transiently after the activation of the earliest  
214 glomerulus (Fig.2A1, bottom) and decayed subsequently due to the firing of



215 inhibitory GCs (Fig.2A2) when centrifugal feedback was OFF. With centrifugal  
216 feedback turned ON, however, the M/T population firing rate maintained long-  
217 lasting dynamics (Fig.2B1, bottom), despite the ramping increase of GC firings  
218 (Fig.2B2). Dissecting the firings of individual cells revealed that some M/T cells  
219 were enhanced by centrifugal feedback, thus firing persistently throughout a sniff  
220 cycle, while other M/T cells were largely suppressed by feedback, only firing  
221 sparsely (Fig.2A1 and Fig.2B1, top). In this example, the M/T cells enhanced by  
222 centrifugal feedback were driven by odor-activated glomeruli. Consistent with  
223 previous studies (Boyd et al., 2012; Otazu et al., 2015), we found that feedback  
224 could influence the activity patterns of both the excitatory M/T cells and the  
225 inhibitory GC neurons in the MOB.

226 In individual neurons, and by extension, the activity of the network,  
227 dynamics are determined by the relative ratio of excitatory and inhibitory synaptic  
228 drive (Nelson and Valakh, 2015). To study how these synaptic changes  
229 contributing to changes in the dynamics of the network, we plotted the voltages  
230 and various synaptic inputs for two representative M/T cells in Fig. 3A1 and  
231 Fig.3B1. The example cell receiving glomerular input (M/T 1) only fired transiently  
232 at the early phase of the glomerular input for feedback OFF but kept firing  
233 throughout glomerular activation when feedback was ON. By contrast, the cell not  
234 receiving glomerular input (M/T 2) fired spontaneously when feedback was OFF  
235 but was silenced when centrifugal feedback was turned ON. A different model  
236 odor would activate a different subset of glomeruli, with different subsets of M/T  
237 cells enhanced and suppressed by centrifugal feedback. To understand the effect  
238 of centrifugal feedback on M/T cells across all 300 model odors (Fig.S2), we  
239 compared the odor-evoked responses of each cell between feedback ON and OFF  
240 (Fig.2C and Fig.S3). The feedback-induced changes in M/T firing rates were  
241 bimodally distributed, with one mode corresponding to the M/T cell responses  
242 enhanced by feedback and the other mode corresponding to the M/T cell  
243 responses that were suppressed. Centrifugal feedback effectively increased the  
244 signal-to-noise ratio of the MOB output by selectively enhancing the firing of M/T  
245 cells driven by odor-activated glomeruli and suppressing the activity of M/T cells  
246 not connected to the stimulated glomeruli.

247 Furthermore, we found that similar to M/T cells, centrifugal feedback  
248 resulted in both enhancement and suppression of firing rates among the GCs  
249 (Fig.2D and Fig.S3) even though all centrifugal inputs were excitatory.  
250 Suppression of GC firing arose from GCs receiving heterogenous disinaptic  
251 inhibition from other GCs as has been previously reported (Fig.3A2 and Fig.3B2  
252 (Boyd et al., 2012). One example cell, GC 1 (Fig.3A2 and Fig.3B2) received larger  
253 centrifugal input and smaller GC inhibition than another example cell, GC 2, such  
254 that the former was enhanced while the latter was suppressed. Balances between  
255 excitatory and inhibitory inputs have long been thought to be essential for  
256 stabilizing the dynamics of a network (Chen and Padmanabhan, 2020; Ozeki et al.,  
257 2009). We found that feedback played a role in stabilizing this balance. To  
258 quantify this, we calculated the ratio of excitatory and inhibitory synaptic inputs for



259 each cell (Fig.3C and Fig.3D), a measurement that reflected the balance across  
260 all inputs to each cell during a sniff. Positive values indicated that a cell's  
261 subthreshold membrane dynamics were dominated by excitation, while negative  
262 values corresponded to a net inhibitory drive, with zero corresponding to a balance  
263 of the two. When feedback was OFF, almost all M/T cells were dominated by  
264 inhibition and all GCs were dominated by excitation (Fig.3C). However, when  
265 feedback was turned ON, the synaptic drive to both M/T cells and GCs became  
266 bimodally distributed (Fig.3D). The two peaks for GCs were located on opposite  
267 sides of zero, with one subpopulation of GCs dominated by excitation and the other  
268 dominated by inhibition. Feedback therefore drove single cells largely with  
269 excitation or inhibition, but balanced these forces across the network. As a result,  
270 although M/T cells formed distributive connections with GCs in MOB, centrifugal  
271 feedback from PCx engaged functionally distinct subpopulations of local inhibitory  
272 interneurons by shaping the ratio of excitatory to inhibitory inputs (E/I) thereby  
273 modulating the firing activity of M/T cells.

#### 274 **Centrifugal feedback controls the temporal dynamics of PCx, leading to a** 275 **circuit that is critical for pattern separation.**

276 Piriform cortex has been shown to be essential for integrating odor information  
277 from individual glomeruli to form odor perception (Gottfried, 2010; Miura et al.,  
278 2012; Stettler and Axel, 2009) and has a critical role in guiding behaviors (Choi et  
279 al., 2011). We next wanted to know how restructuring the dynamics of the M/T  
280 cells that are the inputs to piriform cortex by centrifugal projections impacted the  
281 dynamics of PCx itself.

282 First, when centrifugal feedback was OFF, piriform cortical cells (PCs)  
283 increased their population firing rates, peaking ~16ms after the activation of the  
284 earliest glomerulus (Fig.4A). This activity was sharply truncated by the local  
285 feedback inhibitory (FBI) cells which were recruited within PCx, similar to previous  
286 work (Stern et al., 2018). These results are consistent with the model wherein a  
287 temporal to combinatorial remapping occurs as odor representations are relayed  
288 from MOB to piriform cortex. When centrifugal feedback was turned ON however,  
289 we found that PCs fired persistently throughout the sniff cycle (including over  
290 activation of multiple temporally staggered glomeruli) (Fig.4B). Furthermore, FBI  
291 cells were only sparsely recruited, and no longer truncated the activity of PCs  
292 (Fig.S4). Across an array of different odors, with different patterns and timings of  
293 glomerular activity, centrifugal feedback to MOB resulted in a persistent and  
294 prolonged firing in PCs (Fig.4C,  $n = 300$  odors). To quantify these dynamics in  
295 the piriform cell population, we considered three quantities that captured the  
296 overall temporal structure of the trial-averaged firing rate of PCs in response to  
297 each odor: the peak firing rate, the delay between the peak and the activation time  
298 of the earliest glomerulus, and the decay rate from the peak to the baseline firing  
299 rate (Fig.4D). With centrifugal feedback turned ON, the peak firing rate of PCs  
300 decreased significantly (Fig.4E1), characterized by a smaller subset of cells  
301 responding to odor presentation. However, firing across this sparser population

302 persisted longer with smaller decay rates (Fig.4E2). Interestingly, centrifugal  
303 feedback also reduced the response latency of piriform cells to the earliest  
304 glomerular activation (Fig.4E3, bottom). This effect arose entirely from the  
305 information relayed from the bulb to the piriform cortex, as centrifugal feedback  
306 had no significant effect on the response latency of the M/T cells receiving direct  
307 input from the glomeruli (Fig.4E3, top). These data highlighted the impact  
308 centrifugal feedback had on the temporal structure of activity patterns in PCx.

309 Thus far however, these results only tell us that centrifugal feedback can  
310 alter the dynamics of activity in the PCx, leaving open whether such differences  
311 are actually relevant for the coding of odor information in the early olfactory system.  
312 To address this question, we needed an experimental framework that would allow  
313 us to quantify coding. One such approach is an odor discrimination task where an  
314 animal is presented with two odors of varying similarity and trained to respond to  
315 one of these stimuli. The more similar the two odors, the more overlapping their  
316 neural representations will be. One measure of computation then is how network  
317 activity makes these two representations more unique in the patterns of piriform  
318 cortex.

319 To simulate such an experiment, we first presented two model odors  
320 (Fig.1B) to the network and studied the responses of PCs. When feedback was  
321 OFF, both odors evoked a transient burst of spikes followed by a sharp truncation  
322 and persistent suppression in PCx. As a consequence, the PC population firing  
323 rates were largely overlapping (Fig.5A). When centrifugal feedback was turned  
324 ON however, the PC population firing rates to different odors deviated significantly  
325 from one another across time (Fig.5B). As these differences reflected differences  
326 in the identity and spike timing of large ensembles of PCs, we used a  
327 dimensionality reduction method, principal component analysis (PCA, STAR  
328 Methods), to visualize the population responses (10,000 dimensions with each  
329 corresponding to a single PCs) within a low dimensional space defined by the first  
330 three components (Fig.5C and Fig.5D). Odor presentation resulted in trajectories  
331 that began at the origin and extended outward as glomeruli were activated, and  
332 then returning to baseline at the conclusion of the sniff cycle. Importantly, the  
333 ensemble trajectories of the two odors (Fig.5D) became more separable when  
334 centrifugal feedback was turned ON as compared to when feedback was OFF.  
335 This was consistent across a number of pairs of odors (data not shown) and  
336 showed that the dynamics of PCs were strongly shaped by the centrifugal inputs  
337 to the granule cell layer in MOB. This feedback made the population  
338 representations of odors more unique in piriform cortex, an operation central to  
339 pattern separation (Braganza et al., 2020; Chen and Padmanabhan, 2020;  
340 Gschwend et al., 2015).

341

342 **Information gain in odor perception achieved by centrifugal feedback**

343 The previous example highlighted the ways in which changing the identity of  
344 glomeruli activated by two different odors resulted in differences in the encoding in  
345 PCx. This was not surprising and would be predicted regardless of whether the  
346 system used a combinatorial or temporal code. We thus wished to study how  
347 sensitive the neural representation of an odor in PCx was when the identity or  
348 timing of later activated glomeruli was changed. A small change in the  
349 concentration or chemical structure could result in small changes in either the  
350 identity or timing of different glomeruli. By defining odors not in terms of their  
351 chemical structures, but in terms of their glomerular activation patterns, we  
352 systematically explored how differences between two odors that activate different  
353 glomerular patterns impact coding in PCx (Carey et al., 2009; Chong et al., 2020;  
354 Gire et al., 2013b; Smear et al., 2011; Soucy et al., 2009; Spors and Grinvald,  
355 2002).

356 First, we systematically varied either the identity, timing, or both in the  
357 activated glomeruli across a total of 192 different model odors. The PC population  
358 responses to repeated presentations of one odor were visualized as low-  
359 dimensional trajectories (thin curves in Fig.6A1). In this example, single-trial PC  
360 population responses to each odor at a single time were a cluster of points  
361 distributed within the space reflecting the variability across trials of a given odor,  
362 and variability between different odors. At each of these moments in time, we  
363 assessed the differences between the two distributions by projecting the points  
364 onto an optimal linear decoder (Fig. 6A2, STAR Methods). The more separable  
365 the two distributions were, the more accurately the odor could be decoded from  
366 the PC responses, and thus the more information was encoded in PCx. Thus, at  
367 any given time during a sniff cycle, we could measure the amount of odor  
368 information in PCx by calculating the Kullback-Leibler Divergence  $D_{KL}$  (STAR  
369 Methods), which measures the overlap between two probability distributions. The  
370 more distinct two odor representations, the larger the  $D_{KL}$ . For example, at a given  
371 time ( $t = 31ms$ ), the PC responses to Odor-1 and Odor-2 were more easily  
372 distinguishable when the centrifugal feedback switched ON, giving rise to more  
373 separable distributions of the PC responses (Fig.S5).

374 We first considered odor pairs that differed only in the identity of a single  
375 glomerulus. When the identity of the earliest activated glomerulus (G1) was  
376 different (Fig.6B1), the  $D_{KL}$  increased rapidly regardless of whether centrifugal  
377 feedback was ON and OFF (Fig.6B2, left). In these examples, the information in  
378 the spiking activity corresponding to the different representations of the two odors  
379 was sufficient to distinguish them, independent of whether centrifugal feedback  
380 was ON or OFF. This was consistent with previous finding that the first glomerulus  
381 activated carried the bulk of information about each of the odors (Wesson et al.,  
382 2008; Bolding and Franks, 2017; Chong et al., 2020). Interestingly, when  
383 centrifugal feedback was ON the  $D_{KL}$  had a larger magnitude and remained high  
384 even after the first glomerulus was no longer active (Fig.6B2, right), suggesting  
385 that centrifugal feedback enhanced and maintained odor information gains across

386 the sniff cycle, even when the biggest differences in glomerular activation had  
387 already happened. For odor pairs differing in the identity of either the second or  
388 third activated glomerulus (G2 in Fig.6C1 and G3 in Fig.6C2), we observed a  
389 significant increase in  $D_{KL}$  for feedback ON as compared to feedback OFF. As a  
390 result, small differences in either the functional groups between the two odors  
391 being discriminated or the concentration that would result in these small  
392 differences in the activation of the second or third glomeruli could provide  
393 information to the piriform cortex when feedback was ON (Schaefer and Margrie,  
394 2007).

395 If PCx could represent differences in glomerular *identity* as differences in  
396 the timing of piriform activity patterns, we wished to determine if centrifugal  
397 feedback could also enable PCx to encode the differences in the activation *timing*  
398 of glomeruli. To do this, we presented model odors which activated the same  
399 subset of glomeruli but with different onset latencies ( $\Delta t = 15ms$ ). Similar to the  
400 identity differences, switching centrifugal feedback ON significantly increased the  
401  $D_{KL}$  for odors differing in the activation timing of either the second or third  
402 glomerulus (Fig.6D).

403 We summarized these differences across a wide range of pairs of odors  
404 using the cumulative  $D_{KL}$  over the sniff cycle, which served as a measurement of  
405 the total amount of information gained from the differential activation of glomeruli  
406 between the odor pairs (Fig.6E and Fig.6F). When centrifugal feedback was ON,  
407 we found a significant increase in the information in spiking patterns across odors  
408 that differed in either the identity or timing over the three glomeruli activated during  
409 a sniff (Fig.6E and Fig.6F). Activating centrifugal feedback increased the  
410 information gain between two different odors regardless of their similarity (Fig.6G),  
411 meaning that the gains were a general feature arising from the architecture of a  
412 network with centrifugal feedback to inhibitory cells in the bulb. Our results  
413 revealed a novel functional role for centrifugal feedback; effective encoding of  
414 glomerular identity and timing using both the temporal structure and the  
415 combinatorial patterns of cell activity in the piriform cortex.

416

## 417 **Centrifugal feedback improves behavioral performance in odor** 418 **discrimination**

419 Our analysis thus far focused on quantifying the information encoded by the PC  
420 ensembles, leaving open the question of whether this information could be utilized  
421 by animals in decision making. For example, what, if any effect would controlling  
422 centrifugal feedback have on an animal's behavioral performance when asked to  
423 distinguish between two odors? How does the centrifugal feedback circuit control  
424 either the accuracy (how often mistakes are made) or the reaction time (how long  
425 a response is reported) in an odor discrimination task? Such behavioral  
426 measurements are routinely performed in animal experiments, and can act as a

427 proxy for the information in piriform cortex that animals actually have access to  
428 (Abraham et al., 2010; Uchida and Mainen, 2003).

429 We thus bridged the gap between neural coding and behavior by using a  
430 two-alternative forced-choice (2AFC) task (STAR Methods) and then applying the  
431 sequential probability ratio test (SPRT) (Bogacz et al., 2006; Gold and Shadlen,  
432 2007) to model behavioral performance. In such a task, on each trial, a randomly  
433 chosen odor (Odor-1 or Odor-2) was presented, with the odor onset aligning to the  
434 start of a sniff. At each time during a sniff cycle, noisy momentary evidence was  
435 gained from observing the PC responses sampled from the odor-evoked  
436 probability distribution (Fig.7A1 and Fig.7A2). A choice was made when the  
437 accumulated evidence reached one of the decision boundaries (Fig.7A3) and the  
438 reaction time was recorded to account the decision and a motor delay (normally  
439 distributed with mean = 50ms and std = 5ms). Since only one sniff has been  
440 shown to be sufficient for the animal to make decisions of maximum accuracy  
441 (Uchida and Mainen, 2003; Wesson et al., 2008), the model was constructed to  
442 report which odor was presented by the end of a single sniff (Odor-1 or Odor-2). If  
443 neither decision boundary was reached before the end of the sniff, the choice was  
444 made by chance ( $P(\text{Odor-1}) = P(\text{Odor-2}) = 0.5$ ), equivalent to a random guess  
445 that the animal might make because it could not distinguish between the two odors.

446 To examine how the accuracy and reaction time of discrimination were  
447 influenced by odor similarity, we varied the glomerular timing between two odors  
448 by 5ms increments in each glomerulus. The larger the difference in glomerular  
449 timing, the more different the two odors were. Such differences corresponded  
450 experimentally to either differences in odor concentration or odor identity (Meister  
451 and Bonhoeffer, 2001; Schaefer and Margrie, 2007) in a discrimination task  
452 requiring the animal to discriminate between two similar odors, or between different  
453 concentrations of a single odor. In each case the differences the animal perceives  
454 would be due to subtle differences in the timing of the activated glomeruli. First,  
455 when we simulated increasing differences in timing of the first glomerulus (G1)  
456 between the two odors, the accuracy increased and the reaction time reduced  
457 regardless of whether centrifugal feedback was OFF or ON (Fig.7B1), a result  
458 consistent with previous studies (Palmer et al., 2005; Uchida and Mainen, 2003).  
459 However, for any given difference in glomerular timing associated with two different  
460 odors, switching centrifugal feedback ON increased the accuracy and reduced the  
461 reaction time, corresponding to an improvement in the animals' behavioral  
462 performance in discrimination. For subsequent glomeruli, differences in the timing  
463 of glomerular activity could occur bidirectionally, i.e., glomerulus 2 (G2) activated  
464 by odor 1 could occur either earlier (negative values) or later (positive values) than  
465 G2 for odor 2 (Fig.7B2 and Fig.7B3). For both timing shifts associated with G2 or  
466 G3, the discrimination performance was improved when the centrifugal feedback  
467 was turned ON. Interestingly, shifting the G2 or G3 latencies earlier resulted in  
468 larger changes in accuracy and reaction time as compared to shifting them later,  
469 providing further mechanistic support for the importance of the earliest activated



470 glomeruli in guiding odor discrimination behaviors (Chong et al., 2020; Wilson et  
471 al., 2017). A temporal shift of  $-45ms$  in G2 latency for one odor would mean that  
472 G2 becomes the first one activated, making it G1. The resultant alternation in the  
473 order of glomerular activation would render the differences between the two odors  
474 differences in glomerular identity rather than timing. As a consequence, we  
475 observed a significant jump in accuracy (over 10% increase from  $-40ms$  to  
476  $-45ms$ ) as well as a decline in the reaction time (over  $50ms$  reduction from  $-40ms$   
477 to  $-45ms$ ), echoing the important role of the earliest activated glomerulus in  
478 establishing odor perception. Our results revealed the essential role that  
479 centrifugal feedback had in shaping how odor information could guide animal  
480 behavior, in this example for an odor discrimination task.

481



## 482 Discussion

483 Using a spiking neuronal network model that recapitulated the details of circuit  
484 architecture within and between MOB and piriform cortex (PCx), we identified a  
485 novel role of centrifugal feedback: enabling PCx to extract information about odors  
486 from both the *identify* and *timing of* activation patterns across mitral and tufted (M/T)  
487 cells. When the centrifugal feedback weights were “turned off”, piriform cortical  
488 cells (PCs) responded transiently to the earliest activated glomerulus, consistent  
489 with the models of olfactory coding in the piriform cortex whereby the combinatorial  
490 pattern of activated cells are used to represent odors (Stern et al., 2018). When  
491 the centrifugal feedback weights to the local inhibitory interneurons (GCs) in MOB  
492 were artificially “turned on”, we found that PCs fired persistently throughout odor  
493 presentation. The temporal structure of PC cells reflected the successive activation  
494 of M/T cell population by different glomeruli and was informative about odors.  
495 When the activity patterns across the piriform cortical cell population responding  
496 to different odors were compared, these were more separable with feedback ON  
497 which enhanced the information encoded in the population. This effect proved  
498 robust to variation in identify or timing differences in either the earliest or later  
499 activated glomeruli over the course of a sniff. Furthermore, in an odor  
500 discrimination task, we found that the increased information in PCx activity patterns  
501 resulted in improved behavioral performance in both accuracy and reaction time.

502 The coding strategy used by the olfactory piriform cortex to represent odor  
503 information remains an open question in sensory neuroscience, in part because  
504 many plausible strategies has been proposed based on the structure of neural  
505 circuits and the activity patterns in the early olfactory system. Features of odors,  
506 including their identity and concertation, are represented in the temporal patterns  
507 of glomerular activation (Baker et al., 2019; Rubin and Katz, 1999; Spors and  
508 Grinvald, 2002; Vincis et al., 2012), and result in differences in the identity and  
509 timing of activated mitral and tufted cells (Bathellier et al., 2008; Cury and Uchida,  
510 2010; Kay and Laurent, 1999). In the piriform cortex, studies suggest this temporal  
511 information from the bulb is remapped onto a combinatorial pattern of activity  
512 across piriform cells (Bolding and Franks, 2017; Stern et al., 2018; Stettler and  
513 Axel, 2009). Such a coding strategy is attractive for a number of reasons. First,  
514 the random connectivity of mitral/tufted cells to individual piriform cortical neurons  
515 provides an anatomical underpinning for such a combinatorial code (Sosulski et  
516 al., 2011). Second, such an architecture may be one biological implementation of  
517 compressed sensing, a mathematical framework for optimal encoding (Babadi and  
518 Sompolinsky, 2014; Ganguli and Sompolinsky, 2012; Stevens, 2015). Finally,  
519 neurophysiological studies show that the local inhibition within the cortex (Bekkers  
520 and Suzuki, 2013) truncates the activity of piriform cortical neurons, restricting  
521 patterns of neuronal firing to narrow windows of opportunity (Bolding and Franks,  
522 2017; Miura et al., 2012). These packets of information would represent the  
523 identity and concentration of odors in the environment (Bolding and Franks, 2017;  
524 Gire et al., 2013b), not unlike network packets used to transmit information in  
525 digital communication.

526           Although this framework has provided a number of insights into the ways in  
527 which olfactory information may be encoded, results from recent studies may merit  
528 a reevaluation and refinement of this model. First, as experimental studies control  
529 the odor onset and offset, often with relation to the sniff, such a design establishes  
530 a temporal bound over which piriform cortical cell activity can be thought to be  
531 informative. Natural odor plumes fluctuate across multiple spatial and temporal  
532 scales (Ackels et al., 2021; Lewis et al., 2021), often resulting in fluctuations in  
533 odor concentration that are informative about the composition or location of an  
534 odor source (Celani et al., 2014; Moore and Atema, 1991; Riffell et al., 2014;  
535 Schmuker et al., 2016; Szyszka et al., 2014). In these natural examples, a single  
536 window corresponding to odor onset and offset would be difficult to define, and  
537 subsequent strategies for identifying time windows during which to optimally decode  
538 piriform cortical activity would be problematic. Second, a number of studies have  
539 shown that animals use information nested in the timing of glomerular activation of  
540 different odors to guide behavior (Chong et al., 2020; Rebello et al., 2014; Smear  
541 et al., 2011), meaning at the very least, there are circuits in the early olfactory  
542 system that are sensitive to timing differences and that these differences are  
543 behaviorally meaningful. Previous studies have shown that rodents can be trained  
544 to discriminate between highly similar odors and their accuracy is strongly  
545 correlated with reaction time, often known as the speed-accuracy trade-off  
546 (Rinberg et al., 2006; Uchida and Mainen, 2003). Accuracy significantly increases  
547 when the mice sample the odor stimulus for longer periods of time (Ackels et al.,  
548 2021), suggests information is gained throughout the odor presentation, rather  
549 than only at the onset of an odor presentation (or encounter) or within a narrow  
550 sniff-locked time window; further evidence for the importance of temporally  
551 structured activity.

552           Each of these models/frameworks provides some generalized rules as to  
553 how the brain uses the structure of neuronal activity to encode information about  
554 stimuli. Here we demonstrate that these two models are instantiations of a single  
555 flexible circuit in the early olfactory system, one in which feedback or centrifugal  
556 input from piriform cortex to the bulb restructures what critical features of activity  
557 patterns are relayed to the olfactory cortex.

558           If for example two odors in a discrimination task are markedly different, a  
559 combinatorial code would be sufficient for piriform cortex to distinguish between  
560 the two. In this example, weak centrifugal input to the bulb would result in piriform  
561 cortical cells being sensitive only to the input from M/T cells driven by the earliest  
562 activate glomerulus. However, in cases where an odor discrimination task is  
563 complex, for example because the two odors activate highly overlapping  
564 populations of glomeruli, or because small differences in concentration need to be  
565 detected, a change in the top-down weight of centrifugal feedback to the granule  
566 cells could have a number of effects on neuronal firing that would be  
567 computationally beneficial (Chen and Padmanabhan, 2020; Schaefer and Margrie,  
568 2007). First, centrifugal feedback would thus enhance the signal-to-noise ratio of  
569 MOB output, increasing the information content of signals leaving the bulb.

570 Second, by encoding the dynamics of later activating glomeruli in the firing of  
571 piriform cortical cells, feedback would effectively allow time to be an additional  
572 dimension with which an animal can gain information about the odors in the  
573 environment. Such a strategy could serve two purposes; (1) encoding the fast  
574 fluctuations that occur in odor plumes and using this information to identify an odor  
575 source or to track an odor trail; (2) using time to gain additional information about  
576 an odor even if its identity or concentration does not change significantly over sniffs.

577 We have remained agnostic about the biological mechanisms that flexibly  
578 turn on and off centrifugal feedback, instead focusing on the functional  
579 consequences and computational benefits. There are however several ways that  
580 the flexible control of feedback weights could be implemented. On short time  
581 scales, neuromodulators acting on the granule cell dendrites could be critical for  
582 controlling the magnitude of feedback. Studies on neuromodulators in the bulb  
583 have found that serotonin can modulate glomerular activity by acting on short axon  
584 cells (via 5HT 2C receptors) (Brill et al., 2016; Petzold et al., 2009), and can also  
585 modulate the odor responses of mitral and tufted cells on fast, sub-second time  
586 scales (Kapoor et al., 2016). Neuromodulation could therefore impact either  
587 presynaptic release or the postsynaptic receptor population at the synapses  
588 between centrifugal feedback axons and granule cell dendrites, effectively  
589 changing the strength of top-down inputs to the bulb. Another possible mechanism  
590 is through synaptic plasticity and learning which can act on time scales from hours  
591 to weeks. Several studies have shown that piriform cortex is involved in olfactory  
592 learning processes (Cohen et al., 2008; Hasselmo and Bower, 1990; Litaudon et  
593 al., 1997), and long-term potentiation (LTP) and plasticity observed in this region  
594 can regulate the bulb activity (Cauthron and Stripling, 2014). If for example, the  
595 synaptic weights were selectively increased between centrifugal inputs and  
596 subsets of granule cells activated during an odor discrimination task, then the  
597 resultant changes in granule cell inhibition onto M/T cells would reflect the learned  
598 discrimination (Abraham et al., 2010). In such a framework, the switching between  
599 feedback ON and OFF would be more akin to a change in the synaptic weights  
600 over the course of learning that increased the influence of some centrifugal fibers  
601 on the granule cell population. On even longer time scales, changes in the weights  
602 of centrifugal feedback may be instantiated by adult neurogenesis (Lledo et al.,  
603 2006). Granule cells are constantly born and added to mature olfactory circuits  
604 throughout animal's lifespan (Arenkiel et al., 2011; Deshpande et al., 2013). Both  
605 the integration and the response properties of these adult-born granule cells  
606 (abGCs) are highly dependent on sensory experience and learning (Alonso et al.,  
607 2006; Lepousez et al., 2014; Livneh et al., 2009; Rochefort et al., 2002). A recent  
608 study shows that the learning-dependent plasticity observed in abGCs may require  
609 piriform feedback activity, a disruption of which during leaning significantly  
610 suppresses the apical spine density increase of abGCs (Wu et al., 2020). These  
611 data illustrate the importance of top-down inputs on the abGCs and could be the  
612 mechanism by which feedback is switched ON and OFF.

613           These mechanisms point to the ways in which centrifugal feedback could  
614 influence animal behavior on diverse time scales, from longer time scales  
615 corresponding to learning novel odors through repeated training to shorter time  
616 scales corresponding to behaviors that are sensitive to fluctuations in the animal's  
617 internal state (Chockanathan et al., 2021). As a consequence, piriform cortex may  
618 not only structure the temporal structure of information it receives, but it may also  
619 deploy this restructuring according to different coding strategies. Such variability  
620 would manifest differently depending on how different experimental paradigms  
621 engage feedback circuits based on the behavioral tasks that the animal is asked  
622 to perform (Ackels et al., 2021; Bolding and Franks, 2018; Boyd et al., 2012; Chong  
623 et al., 2020; Gill et al., 2020; Otazu et al., 2015; Wu et al., 2020). Here we propose  
624 that these differences reveal a novel system for sensory processing, one wherein  
625 the coding strategy is flexibly shifted, possibly in service of different ethological  
626 demands that are constantly placed on the animal in natural settings, but  
627 selectively amplified in lab based on the specific experiments performed.

628 **Acknowledgments**

629 This study was supported by funding from the National Institutes of Health (NIH)  
630 and the National Science Foundation (NSF). KP was funded by NIH R01  
631 MH113924, NSF CAREER 1749772, the Cystinosis Research Foundation, and the  
632 Kilian J. and Caroline F. Schmitt Foundation. This manuscript has been released  
633 as a pre-print. We thank Doug Portman and Julian Meeks for valuable feedback  
634 on the manuscript.

## 635 **References**

- 636 Abraham, N.M., Egger, V., Shimshek, D.R., Renden, R., Fukunaga, I., Sprengel, R., Seeburg, P.H.,  
637 Klugmann, M., Margrie, T.W., Schaefer, A.T., et al. (2010). Synaptic Inhibition in the Olfactory  
638 Bulb Accelerates Odor Discrimination in Mice. *Neuron* *65*, 399–411.
- 639 Ackels, T., Erskine, A., Dasgupta, D., Marin, A.C., Warner, T.P.A., Tootoonian, S., Fukunaga, I.,  
640 Harris, J.J., and Schaefer, A.T. (2021). Fast odour dynamics are encoded in the olfactory system  
641 and guide behaviour. *Nature*.
- 642 Alonso, M., Viollet, C., Gabellec, M.-M., Meas-Yedid, V., Olivo-Marin, J.-C., and Lledo, P.-M.  
643 (2006). Olfactory Discrimination Learning Increases the Survival of Adult-Born Neurons in the  
644 Olfactory Bulb. *Journal of Neuroscience* *26*, 10508–10513.
- 645 Arenkiel, B.R., Hasegawa, H., Yi, J.J., Larsen, R.S., Wallace, M.L., Philpot, B.D., Wang, F., and  
646 Ehlers, M.D. (2011). Activity-Induced Remodeling of Olfactory Bulb Microcircuits Revealed by  
647 Monosynaptic Tracing. *PLoS ONE* *6*, e29423.
- 648 Babadi, B., and Sompolinsky, H. (2014). Sparseness and expansion in sensory representations.  
649 *Neuron* *83*, 1213–1226.
- 650 Baker, K.L., Vasan, G., Gumaste, A., Pieribone, V.A., and Verhagen, J.V. (2019). Spatiotemporal  
651 dynamics of odor responses in the lateral and dorsal olfactory bulb. *PLoS Biol* *17*, e3000409.
- 652 Bathellier, B., Buhl, D.L., Accolla, R., and Carleton, A. (2008). Dynamic Ensemble Odor Coding in  
653 the Mammalian Olfactory Bulb: Sensory Information at Different Timescales. *Neuron* *57*, 586–  
654 598.
- 655 Bekkers, J.M., and Suzuki, N. (2013). Neurons and circuits for odor processing in the piriform  
656 cortex. *Trends in Neurosciences* *36*, 429–438.
- 657 Bogacz, R., Brown, E., Moehlis, J., Holmes, P., and Cohen, J.D. (2006). The physics of optimal  
658 decision making: A formal analysis of models of performance in two-alternative forced-choice  
659 tasks. *Psychological Review* *113*, 700–765.
- 660 Bolding, K.A., and Franks, K.M. (2017). Complementary codes for odor identity and intensity in  
661 olfactory cortex. *ELife* *6*, e22630.
- 662 Bolding, K.A., and Franks, K.M. (2018). Recurrent cortical circuits implement concentration-  
663 invariant odor coding. *Science* *14*.
- 664 Boyd, A.M., Sturgill, J.F., Poo, C., and Isaacson, J.S. (2012). Cortical Feedback Control of Olfactory  
665 Bulb Circuits. *Neuron* *76*, 1161–1174.
- 666 Braganza, O., Müller-Komorowska, D., Kelly, T., and Beck, H. (2020). Quantitative properties of a  
667 feedback circuit predict frequency-dependent pattern separation. *Elife* *9*, e53148.
- 668 Brill, J., Shao, Z., Puche, A.C., Wachowiak, M., and Shipley, M.T. (2016). Serotonin increases  
669 synaptic activity in olfactory bulb glomeruli. *Journal of Neurophysiology* *115*, 1208–1219.



- 670 Buck, L., and Axel, R. (1991). A novel multigene family may encode odorant receptors: a  
671 molecular basis for odor recognition. *Cell* *65*, 175–187.
- 672 Carey, R.M., Verhagen, J.V., Wesson, D.W., Pérez, N., and Wachowiak, M. (2009). Temporal  
673 Structure of Receptor Neuron Input to the Olfactory Bulb Imaged in Behaving Rats. *Journal of*  
674 *Neurophysiology* *101*, 1073–1088.
- 675 Cauthron, J.L., and Stripling, J.S. (2014). Long-Term Plasticity in the Regulation of Olfactory Bulb  
676 Activity by Centrifugal Fibers from Piriform Cortex. *Journal of Neuroscience* *34*, 9677–9687.
- 677 Celani, A., Villermaux, E., and Vergassola, M. (2014). Odor landscapes in turbulent  
678 environments. *Physical Review X* *4*, 041015.
- 679 Chen, Z., and Padmanabhan, K. (2020). Top-Down Control of Inhibitory Granule Cells in the Main  
680 Olfactory Bulb Reshapes Neural Dynamics Giving Rise to a Diversity of Computations. *Front.*  
681 *Comput. Neurosci.* *14*, 59.
- 682 Chockanathan, U., Crosier, E.J., Waddle, S., Lyman, E., Gerkin, R.C., and Padmanabhan, K. (2021).  
683 Changes in pairwise correlations during running reshape global network state in the main  
684 olfactory bulb. *Journal of Neurophysiology* *125*, 1612–1623.
- 685 Choi, G.B., Stettler, D.D., Kallman, B.R., Bhaskar, S.T., Fleischmann, A., and Axel, R. (2011).  
686 Driving Opposing Behaviors with Ensembles of Piriform Neurons. *Cell* *146*, 1004–1015.
- 687 Chong, E., and Rinberg, D. (2018). Behavioral readout of spatio-temporal codes in olfaction.  
688 *Current Opinion in Neurobiology* *52*, 18–24.
- 689 Chong, E., Moroni, M., Wilson, C., Shoham, S., Panzeri, S., and Rinberg, D. (2020). Manipulating  
690 synthetic optogenetic odors reveals the coding logic of olfactory perception. *Science* *368*,  
691 eaba2357.
- 692 Cohen, Y., Reuveni, I., Barkai, E., and Maroun, M. (2008). Olfactory Learning-Induced Long-  
693 Lasting Enhancement of Descending and Ascending Synaptic Transmission to the Piriform  
694 Cortex. *Journal of Neuroscience* *28*, 6664–6669.
- 695 Cury, K.M., and Uchida, N. (2010). Robust Odor Coding via Inhalation-Coupled Transient Activity  
696 in the Mammalian Olfactory Bulb. *Neuron* *68*, 570–585.
- 697 Davison, I.G., and Ehlers, M.D. (2011). Neural Circuit Mechanisms for Pattern Detection and  
698 Feature Combination in Olfactory Cortex. *Neuron* *70*, 82–94.
- 699 Deshpande, A., Bergami, M., Ghanem, A., Conzelmann, K.-K., Lepier, A., Gotz, M., and Berninger,  
700 B. (2013). Retrograde monosynaptic tracing reveals the temporal evolution of inputs onto new  
701 neurons in the adult dentate gyrus and olfactory bulb. *Proceedings of the National Academy of*  
702 *Sciences* *110*, E1152–E1161.
- 703 Ganguli, S., and Sompolinsky, H. (2012). Compressed sensing, sparsity, and dimensionality in  
704 neuronal information processing and data analysis. *Annual Review of Neuroscience* *35*, 485–  
705 508.

- 706 Gill, J.V., Lerman, G.M., Zhao, H., Stetler, B.J., Rinberg, D., and Shoham, S. (2020). Precise  
707 Holographic Manipulation of Olfactory Circuits Reveals Coding Features Determining Perceptual  
708 Detection. *Neuron* *108*, 382–393.e5.
- 709 Gire, D.H., Restrepo, D., Sejnowski, T.J., Greer, C., De Carlos, J.A., and Lopez-Mascaraque, L.  
710 (2013a). Temporal Processing in the Olfactory System: Can We See a Smell? *Neuron* *78*, 416–  
711 432.
- 712 Gire, D.H., Whitesell, J.D., Doucette, W., and Restrepo, D. (2013b). Information for decision-  
713 making and stimulus identification is multiplexed in sensory cortex. *Nat Neurosci* *16*, 991–993.
- 714 Gold, J.I., and Shadlen, M.N. (2007). The Neural Basis of Decision Making. *Annu. Rev. Neurosci.*  
715 *30*, 535–574.
- 716 Gottfried, J.A. (2010). Central mechanisms of odour object perception. *Nat Rev Neurosci* *11*,  
717 628–641.
- 718 Gschwend, O., Abraham, N.M., Lagier, S., Begnaud, F., Rodriguez, I., and Carleton, A. (2015).  
719 Neuronal pattern separation in the olfactory bulb improves odor discrimination learning. *Nat*  
720 *Neurosci* *18*, 1474–1482.
- 721 Haddad, R., Lanjuin, A., Madisen, L., Zeng, H., Murthy, V.N., and Uchida, N. (2013). Olfactory  
722 cortical neurons read out a relative time code in the olfactory bulb. *Nat Neurosci* *16*, 949–957.
- 723 Hasselmo, M.E., and Bower, J.M. (1990). Afferent and association fiber differences in short-term  
724 potentiation in piriform (olfactory) cortex of the rat. *Journal of Neurophysiology* *64*, 179–190.
- 725 Johnson, B.A., and Leon, M. (2007). Chemotopic odorant coding in a mammalian olfactory  
726 system. *J. Comp. Neurol.* *503*, 1–34.
- 727 Kapoor, V., and Urban, N.N. (2006). Glomerulus-Specific, Long-Latency Activity in the Olfactory  
728 Bulb Granule Cell Network. *Journal of Neuroscience* *26*, 11709–11719.
- 729 Kapoor, V., Provost, A.C., Agarwal, P., and Murthy, V.N. (2016). Activation of raphe nuclei  
730 triggers rapid and distinct effects on parallel olfactory bulb output channels. *Nat Neurosci* *19*,  
731 271–282.
- 732 Kay, L.M., and Laurent, G. (1999). Odor- and context-dependent modulation of mitral cell  
733 activity in behaving rats. *Nat Neurosci* *2*, 1003–1009.
- 734 Laurent, G. (2002). Olfactory network dynamics and the coding of multidimensional signals.  
735 *Nature Reviews Neuroscience* *3*, 884–895.
- 736 Lepousez, G., Nissant, A., Bryant, A.K., Gheusi, G., Greer, C.A., and Lledo, P.-M. (2014). Olfactory  
737 learning promotes input-specific synaptic plasticity in adult-born neurons. *Proceedings of the*  
738 *National Academy of Sciences* *111*, 13984–13989.
- 739 Lewis, S.M., Xu, L., Rigolli, N., Tariq, M.F., Suarez, L.M., Stern, M., Seminara, A., and Gire, D.H.  
740 (2021). Plume Dynamics Structure the Spatiotemporal Activity of Mitral/Tufted Cell Networks in  
741 the Mouse Olfactory Bulb. *Front. Cell. Neurosci.* *15*, 633757.

- 742 Litaudon, P., Mouly, A.-M., Sullivan, R., Gervais, R., and Cattarelli, M. (1997). Learning-induced  
743 Changes in Rat Piriform Cortex Activity Mapped Using Multisite Recording With Voltage  
744 Sensitive Dye. *European Journal of Neuroscience* *9*, 1593–1602.
- 745 Livneh, Y., Feinstein, N., Klein, M., and Mizrahi, A. (2009). Sensory Input Enhances  
746 Synaptogenesis of Adult-Born Neurons. *Journal of Neuroscience* *29*, 86–97.
- 747 Lledo, P.-M., Alonso, M., and Grubb, M.S. (2006). Adult neurogenesis and functional plasticity in  
748 neuronal circuits. *Nat Rev Neurosci* *7*, 179–193.
- 749 Malnic, B., Hirono, J., Sato, T., and Buck, L.B. (1999). Combinatorial Receptor Codes for Odors.  
750 *Cell* *96*, 713–723.
- 751 Markopoulos, F., Rokni, D., Gire, D.H., and Murthy, V.N. (2012). Functional properties of cortical  
752 feedback projections to the olfactory bulb. *Neuron* *76*, 1175–1188.
- 753 Meister, M., and Bonhoeffer, T. (2001). Tuning and Topography in an Odor Map on the Rat  
754 Olfactory Bulb. *J. Neurosci.* *21*, 1351–1360.
- 755 Miura, K., Mainen, Z.F., and Uchida, N. (2012). Odor Representations in Olfactory Cortex:  
756 Distributed Rate Coding and Decorrelated Population Activity. *Neuron* *74*, 1087–1098.
- 757 Mombaerts, P., Wang, F., Dulac, C., Chao, S.K., Nemes, A., Mendelsohn, M., Edmondson, J., and  
758 Axel, R. (1996). Visualizing an Olfactory Sensory Map. *Cell* *87*, 675–686.
- 759 Moore, P.A., and Atema, J. (1991). Spatial information in the three-dimensional fine structure of  
760 an aquatic odor plume. *The Biological Bulletin* *181*, 408–418.
- 761 Mori, K., and Sakano, H. (2021). Olfactory Circuitry and Behavioral Decisions. *Annu. Rev. Physiol.*  
762 *83*, 231–256.
- 763 Nelson, S.B., and Valakh, V. (2015). Excitatory/inhibitory balance and circuit homeostasis in  
764 autism spectrum disorders. *Neuron* *87*, 684–698.
- 765 Oswald, A.-M., and Urban, N.N. (2012). There and Back Again: The Corticobulbar Loop. *Neuron*  
766 *76*, 1045–1047.
- 767 Otazu, G.H., Chae, H., Davis, M.B., and Albeanu, D.F. (2015). Cortical Feedback Decorrelates  
768 Olfactory Bulb Output in Awake Mice. *Neuron* *86*, 1461–1477.
- 769 Ozeki, H., Finn, I.M., Schaffer, E.S., Miller, K.D., and Ferster, D. (2009). Inhibitory Stabilization of  
770 the Cortical Network Underlies Visual Surround Suppression. *Neuron* *62*, 578–592.
- 771 Padmanabhan, K., and Urban, N.N. (2014). Disrupting information coding via block of 4-AP-  
772 sensitive potassium channels. *Journal of Neurophysiology* *112*, 1054–1066.
- 773 Padmanabhan, K., Osakada, F., Tarabrina, A., Kizer, E., Callaway, E.M., Gage, F.H., and Sejnowski,  
774 T.J. (2016). Diverse Representations of Olfactory Information in Centrifugal Feedback  
775 Projections. *Journal of Neuroscience* *36*, 7535–7545.

- 776 Padmanabhan, K., Osakada, F., Tarabrina, A., Kizer, E., Callaway, E.M., Gage, F.H., and Sejnowski,  
777 T.J. (2019). Centrifugal Inputs to the Main Olfactory Bulb Revealed Through Whole Brain Circuit-  
778 Mapping. *Front. Neuroanat.* *12*, 115.
- 779 Palmer, J., Huk, A.C., and Shadlen, M.N. (2005). The effect of stimulus strength on the speed and  
780 accuracy of a perceptual decision. *Journal of Vision* *30*.
- 781 Paninski, L., Pillow, J., and Lewi, J. (2007). Statistical models for neural encoding, decoding, and  
782 optimal stimulus design. *Progress in Brain Research* *165*, 493–507.
- 783 Paoli, M., Albi, A., Zanon, M., Zanini, D., Antolini, R., and Haase, A. (2018). Neuronal Response  
784 Latencies Encode First Odor Identity Information across Subjects. *J. Neurosci.* *38*, 9240–9251.
- 785 Petzold, G.C., Hagiwara, A., and Murthy, V.N. (2009). Serotonergic modulation of odor input to  
786 the mammalian olfactory bulb. *Nat Neurosci* *12*, 784–791.
- 787 Rebello, M.R., McTavish, T.S., Willhite, D.C., Short, S.M., Shepherd, G.M., and Verhagen, J.V.  
788 (2014). Perception of Odors Linked to Precise Timing in the Olfactory System. *PLoS Biol* *12*,  
789 e1002021.
- 790 Riffell, J.A., Shlizerman, E., Sanders, E., Abrell, L., Medina, B., Hinterwirth, A.J., and Kutz, J.N.  
791 (2014). Flower discrimination by pollinators in a dynamic chemical environment. *Science* *344*,  
792 1515–1518.
- 793 Rinberg, D., Koulakov, A., and Gelperin, A. (2006). Speed-Accuracy Tradeoff in Olfaction. *Neuron*  
794 *51*, 351–358.
- 795 Rochefort, C., Gheusi, G., Vincent, J.-D., and Lledo, P.-M. (2002). Enriched Odor Exposure  
796 Increases the Number of Newborn Neurons in the Adult Olfactory Bulb and Improves Odor  
797 Memory. *J. Neurosci.* *22*, 2679–2689.
- 798 Rubin, B.D., and Katz, L.C. (1999). Optical Imaging of Odorant Representations in the  
799 Mammalian Olfactory Bulb. *Neuron* *23*, 499–511.
- 800 Schaefer, A.T., and Margrie, T.W. (2007). Spatiotemporal representations in the olfactory  
801 system. *Trends in Neurosciences* *30*, 92–100.
- 802 Schmuker, M., Bahr, V., and Huerta, R. (2016). Exploiting plume structure to decode gas source  
803 distance using metal-oxide gas sensors. *Sensors and Actuators B: Chemical* *235*, 636–646.
- 804 Shipley, M.T., and Adamek, G.D. (1984). the connections of the mouse olfactory bulb: A study  
805 using orthograde and retrograde transport of wheat germ agglutinin conjugated to horseradish  
806 peroxidase. *Brain Research Bulletin* *12*, 669–688.
- 807 Shusterman, R., Smear, M.C., Koulakov, A.A., and Rinberg, D. (2011). Precise olfactory responses  
808 tile the sniff cycle. *Nat Neurosci* *14*, 1039–1044.
- 809 Smear, M., Shusterman, R., O'Connor, R., Bozza, T., and Rinberg, D. (2011). Perception of sniff  
810 phase in mouse olfaction. *Nature* *479*, 397–400.

- 811 Sosulski, D.L., Bloom, M.L., Cutforth, T., Axel, R., and Datta, S.R. (2011). Distinct representations  
812 of olfactory information in different cortical centres. *Nature* 472, 213–216.
- 813 Soucy, E.R., Albeanu, D.F., Fantana, A.L., Murthy, V.N., and Meister, M. (2009). Precision and  
814 diversity in an odor map on the olfactory bulb. *Nat Neurosci* 12, 210–220.
- 815 Spors, H., and Grinvald, A. (2002). Spatio-Temporal Dynamics of Odor Representations in the  
816 Mammalian Olfactory Bulb. *Neuron* 34, 301–315.
- 817 Stern, M., Bolding, K.A., Abbott, L., and Franks, K.M. (2018). A transformation from temporal to  
818 ensemble coding in a model of piriform cortex. *ELife* 7, e34831.
- 819 Stettler, D.D., and Axel, R. (2009). Representations of Odor in the Piriform Cortex. *Neuron* 63,  
820 854–864.
- 821 Stevens, C.F. (2015). What the fly’s nose tells the fly’s brain. *Proceedings of the National*  
822 *Academy of Sciences* 112, 9460–9465.
- 823 Szyszka, P., Gerkin, R.C., Galizia, C.G., and Smith, B.H. (2014). High-speed odor transduction and  
824 pulse tracking by insect olfactory receptor neurons. *Proceedings of the National Academy of*  
825 *Sciences* 111, 16925–16930.
- 826 Uchida, N., and Mainen, Z.F. (2003). Speed and accuracy of olfactory discrimination in the rat.  
827 *Nat Neurosci* 6, 1224–1229.
- 828 Uchida, N., Poo, C., and Haddad, R. (2014). Coding and Transformations in the Olfactory System.  
829 *Annu. Rev. Neurosci.* 37, 363–385.
- 830 Vincis, R., Gschwend, O., Bhaukaurally, K., Beroud, J., and Carleton, A. (2012). Dense  
831 representation of natural odorants in the mouse olfactory bulb. *Nat Neurosci* 15, 537–539.
- 832 Wachowiak, M., and Cohen, L.B. (2001). Representation of Odorants by Receptor Neuron Input  
833 to the Mouse Olfactory Bulb. *Neuron* 32, 723–735.
- 834 Wesson, D.W., Carey, R.M., Verhagen, J.V., and Wachowiak, M. (2008). Rapid Encoding and  
835 Perception of Novel Odors in the Rat. *PLoS Biol* 6, e82.
- 836 Wilson, C.D., Serrano, G.O., Koulakov, A.A., and Rinberg, D. (2017). A primacy code for odor  
837 identity. *Nat Commun* 8, 1477.
- 838 Wu, A., Yu, B., Chen, Q., Matthews, G.A., Lu, C., Campbell, E., Tye, K.M., and Komiyama, T.  
839 (2020). Context-dependent plasticity of adult-born neurons regulated by cortical feedback. *Sci.*  
840 *Adv.* 6, eabc8319.

841

842 **Figures and Tables**

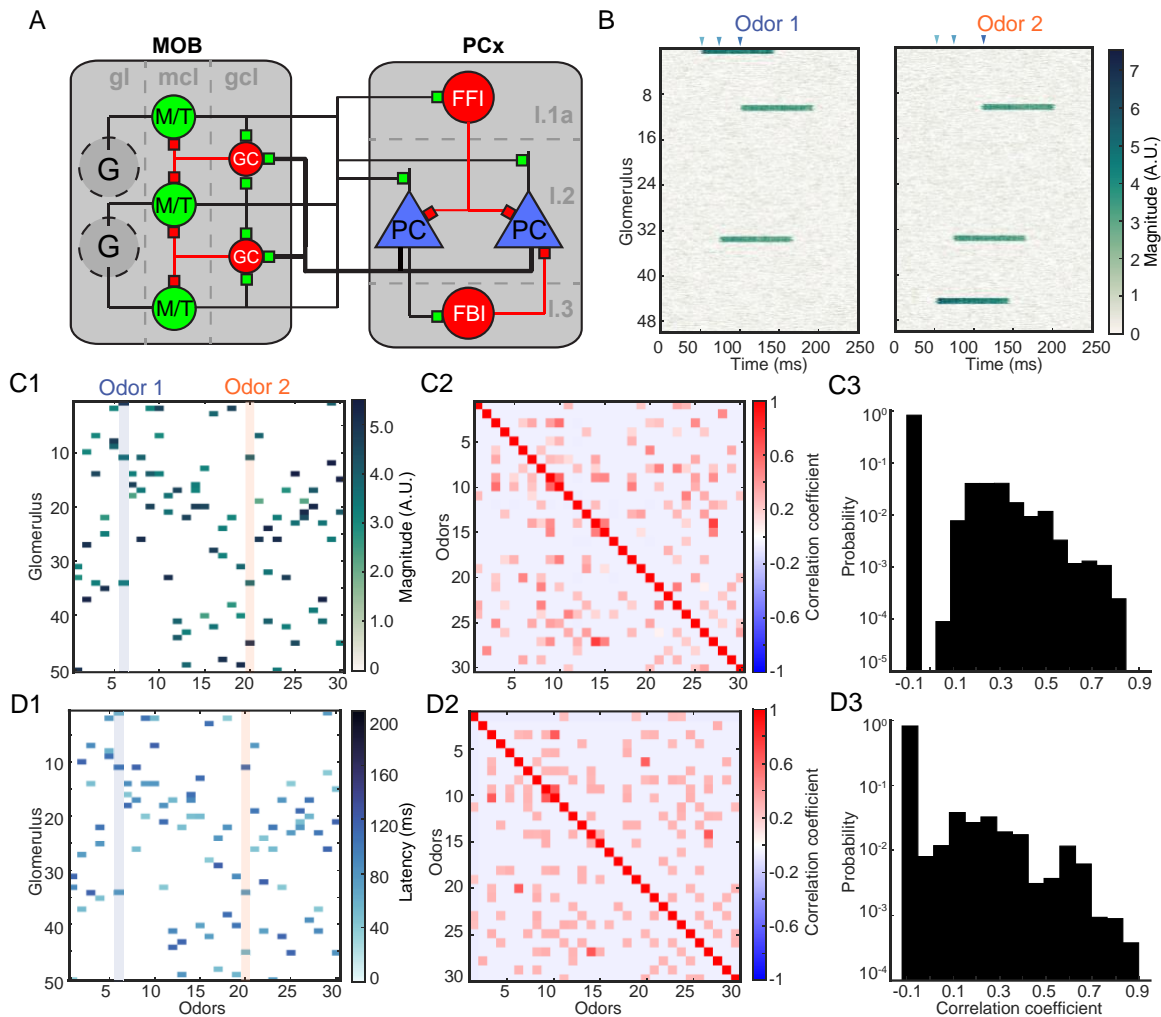

843

844 **Figure 1. Spiking network schematics and odor definition.**

845 (A). Schematics of the MOB–PCx network architecture. In the main olfactory bulb (MOB), glomeruli  
 846 (G) in glomerular layer (gl) relay sensory information to the mitral/tufted cells (M/T) in mitral cell  
 847 layer (mcl). M/T cells receive inhibition from granule cells (GCs) in granule cell layer (gcl). In  
 848 piriform cortex (PCx), piriform cortical neurons (PCs) in layer 2 (I.2) and feedforward inhibitory  
 849 neurons (FFI) in superficial layer (I.1) receive direct feedforward excitation from MOB. Local  
 850 inhibitory neurons (FBI) in deeper layer (I.3) provide feedback inhibition of PCs. Excitatory  
 851 synapses are denoted by green boxes and inhibitory synapses are in red. All recurrent connections  
 852 between cells of the same type are omitted for clarity. The thick connecting lines from PCs to GCs  
 853 correspond to centrifugal feedback from PCx to MOB.

854 (B). Glomerular input patterns for two representative odors. The color bar indicates the magnitude  
 855 of glomerular input. The triangles on top indicate the activation timing of the three glomeruli. Left,  
 856 Odor-1: G1: 52 ms, G2: 74 ms, G3: 101 ms. Right, Odor-2: G1: 52 ms, G2: 74 ms, G3: 110 ms.

857 (C). Magnitude of glomerular input for 30 example odors across 50 glomeruli. (C1): each column  
 858 corresponds to one odor and the two columns highlighted correspond to the two odors shown in



859 (B). (C2): pairwise correlation of magnitude between different odors. (C3): histogram of the pairwise  
860 correlation of magnitude in (C2).

861 (D). Similar to (C) but for glomerular activation timing of each odor. In addition to a large proportion  
862 of weakly anticorrelated odor pairs, the odor table we defined also captures a number of highly  
863 correlated odor pairs.

864

865

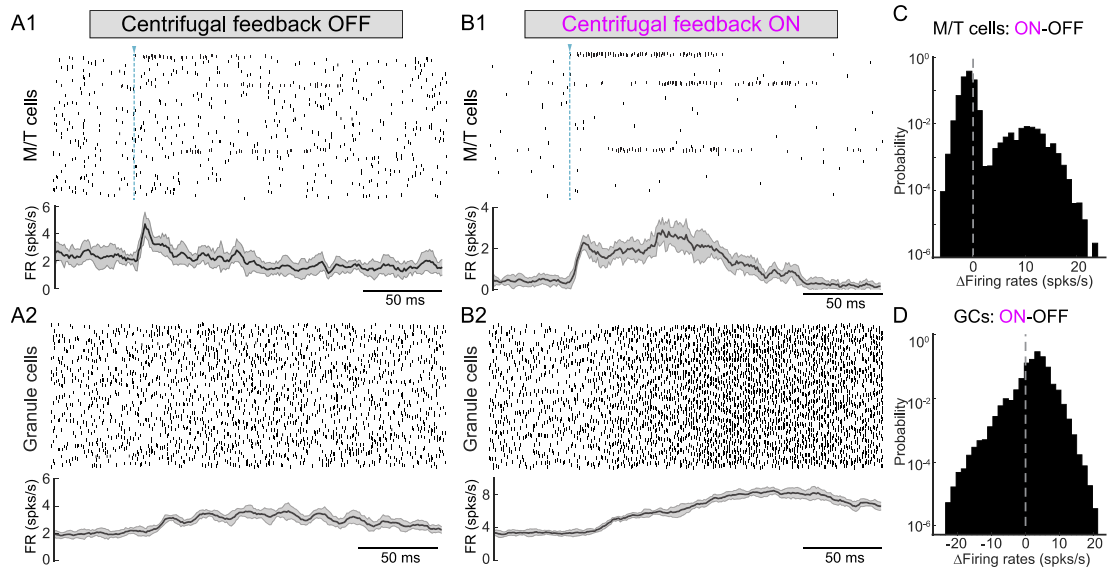

866

867 **Figure 2. Centrifugal feedback modulates M/T firings by controlling granule cell population.**

868 (A). Firings of MOB cells in response to a representative odor with centrifugal feedback OFF. (A1):  
869 raster plot of M/T cells in an example trial (top). Each row corresponds to the spike train of one M/T  
870 cell. Each tick mark is a spike. The blue dashed line indicates the activation timing of the earliest  
871 glomerulus for the representative odor. Bottom: population firing rate of all M/T cells (mean  $\pm$  SD,  
872  $n = 10$  trials). (A2): similar to (A1) but for GCs.

873 (B). Similar to (A) but for centrifugal feedback ON. Three groups of M/T cells driven by odor-  
874 activated glomeruli fire persistently throughout a sniff while others only fire sparsely.

875 (C). Histogram of the feedback-induced changes in the firing rates of each M/T cells ( $n = 1250$   
876 cells) across all model odors ( $n = 300$  odors). Positive values of the firing rate change signify  
877 enhancement by feedback while negative values signify suppression. Centrifugal feedback  
878 enhances a subset of M/T cells while suppresses others.

879 (D). Similar to (C) but for GCs. GCs are both enhanced and suppressed by changes in the  
880 centrifugal feedback, suggesting functionally distinct subpopulations of local inhibitory interneurons  
881 in MOB.

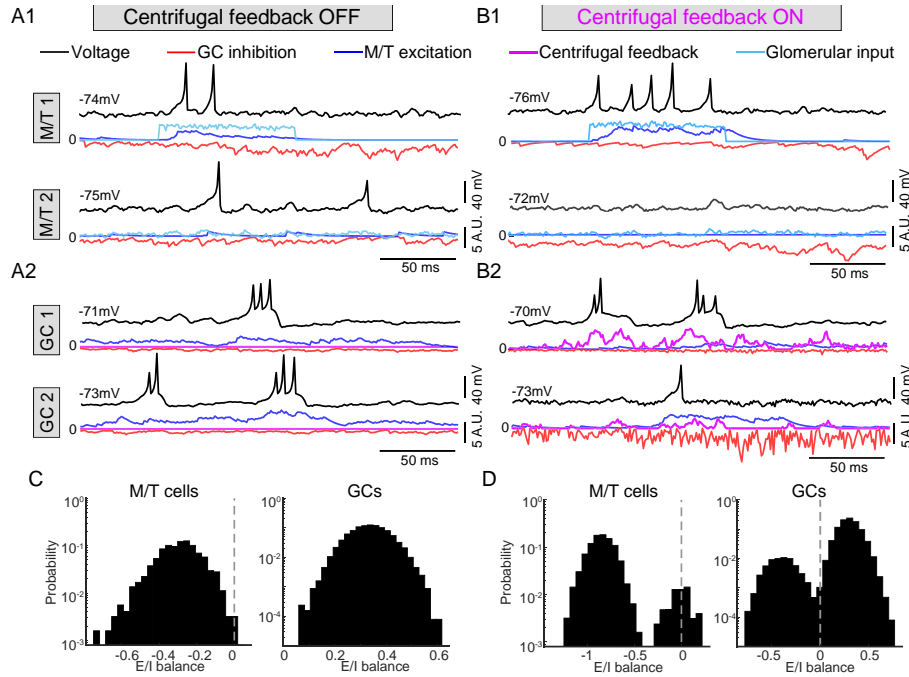

882

883 **Figure 3. Centrifugal feedback modulates the interaction between excitatory and inhibitory**  
 884 **(E/I) synaptic inputs in MOB cells.**

885 (A). Voltage trace (top black) and synaptic inputs (bottom) for two example M/T cells and GCs when  
 886 centrifugal feedback is OFF. (A1): M/T 1 receives glomerular input (cyan trace) from an odor-  
 887 activated glomerulus; M/T 2 only receives weakly fluctuating glomerular input from a non-activated  
 888 glomerulus. (A2): similar to (A1) but for two example GCs. Centrifugal feedback (purple trace) in  
 889 them is zero.

890 (B). Similar to (A) but for centrifugal feedback ON. (B1): the same M/T cells as in (A1) but M/T 1  
 891 fires persistently throughout glomerular activation and M/T 2 remains silenced when feedback is  
 892 ON. (B2): the same two example GCs as in (A2).

893 (C). Histogram of the overall domination of excitatory and inhibitory synaptic inputs during a sniff  
 894 for M/T cells (left) and GCs (right) when feedback is OFF. Glomerular input is not included in the  
 895 excitation for M/T cells. Positive values mean a cell receives more excitation during a sniff and  
 896 negative value means the net synaptic input is inhibition. M/T cells are dominated by inhibition and  
 897 all GCs are dominated by excitation when feedback is OFF

898 (D). Similar to (C) but for feedback ON. Excitatory centrifugal feedback to GCs is included in the  
 899 excitation for GCs. Centrifugal feedback introduces bimodal distributions in the E/I balance for M/T  
 900 cells and GCs, revealing different functionally defined subpopulations of cells.

901

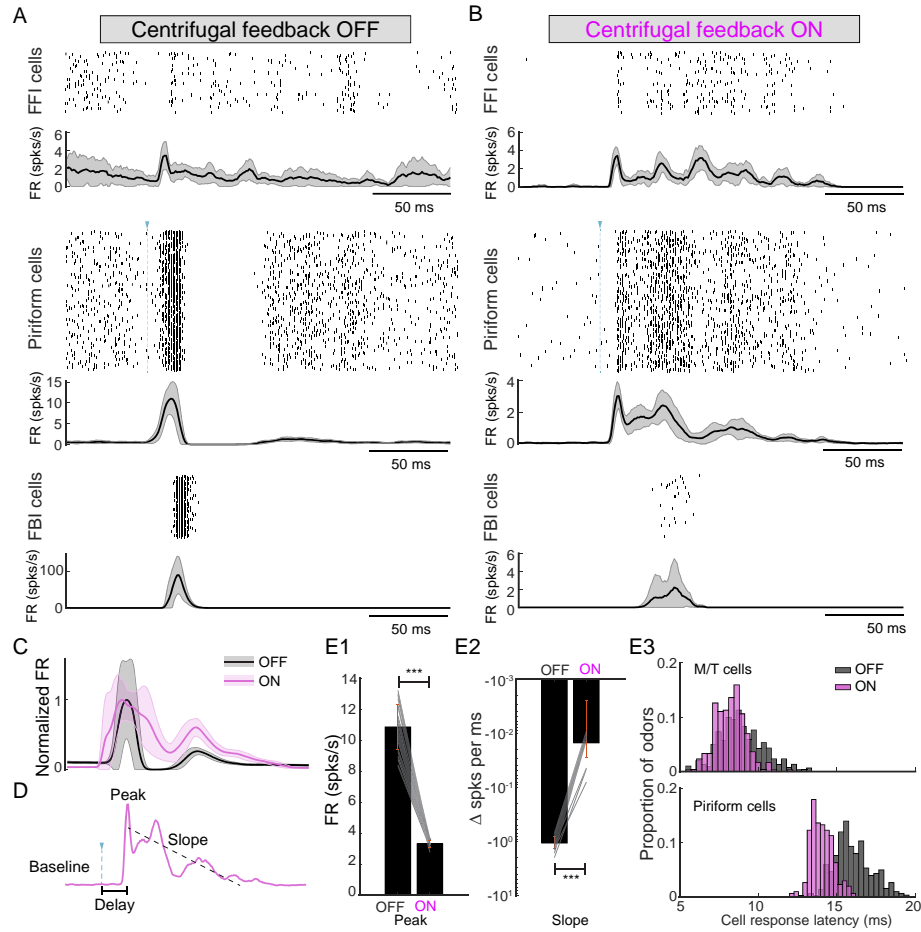

902

903 **Figure 4. Centrifugal feedback unravels the temporal structure in the firings of piriform cells.**

904 (A). Firings of piriform cells (PCs) in response to a representative odor with centrifugal feedback  
 905 OFF. PCs fire with a transient burst of spikes that are sharply truncated by local FBIs and followed  
 906 by persistent suppression. Population firing rates: (mean  $\pm$  SD,  $n = 10$  trials).

907 (B). Similar to (A) but for centrifugal feedback ON. Persistent dynamics of PCs arise due to  
 908 centrifugal feedback. FBI cells are only sparsely activated.

909 (C). PC population firing rate in response to all model odors (mean  $\pm$  SD,  $n = 300$  odors). The  
 910 traces of feedback OFF and ON are normalized to have the same amplitude of peak.

911 (D). Schematic illustration to quantify the dynamics of the PC population firing rate in response to  
 912 a single odor ( $n = 300$  odors). Peak: the first peak in the trial-averaged population firing rate ( $n =$   
 913 10 trials). Slope: the slope of a linear function (oblique dashed line) fitted to the mean firing rate  
 914 between the Peak and the first time when it drops below baseline (firing rate preceding the  
 915 activation of the earliest glomerulus). Delay: the latency between the Peak and the activation time  
 916 of earliest glomerulus defined by the odor (vertical dashed line with a triangle on top).

917 (E). Comparison of PC dynamics between centrifugal feedback OFF vs. ON. (E1). Peak firing rate.  
 918 Error bar:  $\pm$  SD (\*\*\*)  $p < 0.001$  Wilcoxon signed rank test). Connecting lines for 30 example odors  
 919 are shown. (E2). Similar to E1 but for Slope. (E3). Histogram of the Delay across 300 odors. Top:

920 M/T cells; bottom: PCs. Centrifugal feedback reduces the responses latency of PCs without  
921 affecting that of M/T cells.

922

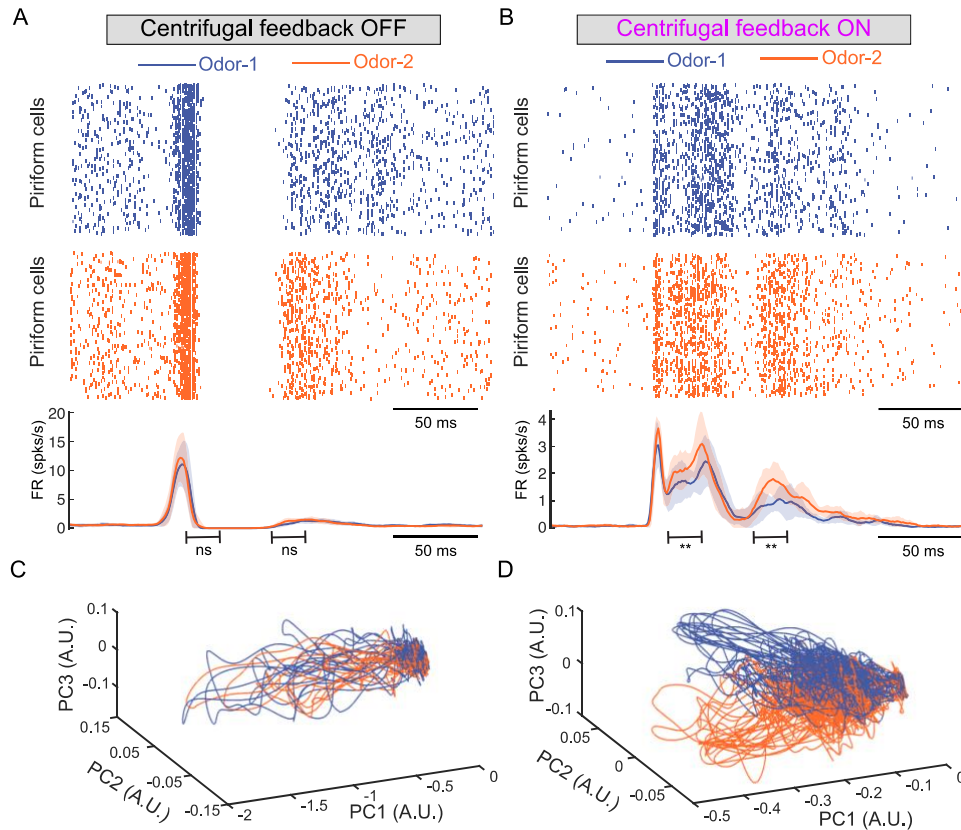

923

924 **Figure 5. Centrifugal feedback increases the separation between piriform cell responses to**  
925 **different odors.**

926 (A). Piriform cell (PC) responses to Odor-1 and Odor-2 (Fig.1B) with centrifugal feedback OFF. Top  
927 top and middle: raster plot of piriform cell responses to Odor-1 and Odor-2 in an example trial. Bottom:  
928 population firing rates of PCs responding to two odors (mean  $\pm$  SD,  $n = 10$  trials). The firing rate  
929 separations between Odor-1 and Odor-2 are nonsignificant (ns:  $p > 0.05$  Wilcoxon rank-sum test).

930 (B). Similar to (A) but for centrifugal feedback ON (mean  $\pm$  SD,  $n = 10$  trials). The firings of PCs  
931 are persistent throughout successive glomerular activation of both odors. The firing rate between  
932 Odor-1 and Odor-2 are significant different during 70 – 90ms and 120 – 140ms (\*\*  $p < 0.01$   
933 Wilcoxon rank-sum test).

934 (C). Low-dimensional projections of ensemble trajectories of PCs onto the first three principal  
935 components when centrifugal feedback is OFF. Each trace corresponds to a single-trial PC  
936 response to one of the odors (color coded). Trajectories for different odors are tangled and non-  
937 separable.

938 (D). Similar to (C) but for centrifugal feedback ON. Centrifugal feedback pushes apart the low-  
939 dimensional trajectories evoked by different odors and makes them more separable.



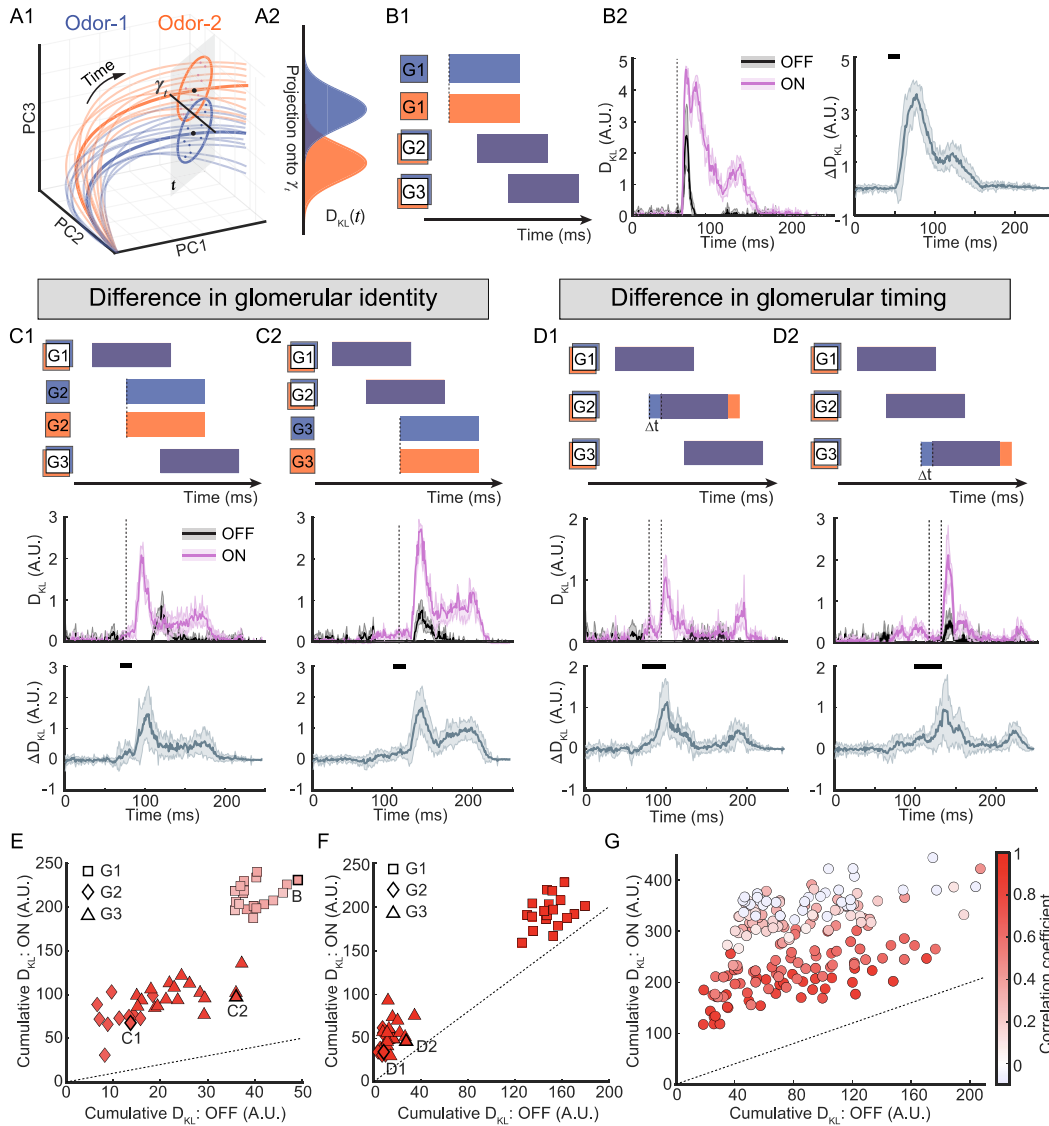

940

941 **Figure 6. Centrifugal feedback enhances odor information gain in PCx.**

942 (A). Schematic for quantifying the odor information encoded by the piriform cell (PC) population  
 943 responses. (A1): odor-evoked PC responses in the low-dimensional space (thick trace: trial-  
 944 averaged responses; thin trace: single-trial responses). The PC responses at a single time step  $t$   
 945 are clusters of points visualized for simplicity on a 2D plane (grey). At each time point,  $\gamma_t$  is the  
 946 optimal linear decoder onto which the points are projected. (A2): PC responses for two different  
 947 odors are projected onto  $\gamma_t$  and form two probability distributions generated from multiple trials for  
 948 each odor. The Kullback–Leibler Divergence ( $D_{KL}(t)$ ) can be used to quantify the separation  
 949 between the two distributions as they vary over time.

950 (B). The  $D_{KL}$  for odor pairs which differ only by the identity of the first glomerulus G1. (B1):  
 951 Schematic of the glomerular activation patterns for a pair of model odors (color coded). Glomerular  
 952 identity is denoted by the vertical position of boxes: G1 boxes for the two odors are non-overlapping  
 953 and thus they have different glomerular identity; G2 boxes (and G3) are overlapping and thus they  
 954 have the same identity. Staggered rectangles indicate glomerular activation. (B2): left:  $D_{KL}$  for one  
 955 example odor pairs when centrifugal feedback is ON or OFF (mean  $\pm$  SD,  $n = 10$  trials). Right: the

956 difference of  $D_{KL}$  between centrifugal feedback ON and OFF ( $\Delta D_{KL} = \text{ON} - \text{OFF}$ ) across different  
957 odor pairs differing in G1 identity (mean  $\pm$  SD,  $n = 19$  odor pairs). Positive values mean  
958 centrifugal feedback enhances odor information encoded in PCx as compared to feedback OFF.

959 (C). Similar to (B) but for the identity difference only in G2 or G3. (C2): top: schematics of the  
960 glomerular activation patterns for a pair of model odors differing in G2 identity. Middle:  $D_{KL}$  for one  
961 example odor pair (mean  $\pm$  SD,  $n = 10$  trials). Bottom:  $\Delta D_{KL}$  across different odor pairs (mean  $\pm$   
962 SD,  $n = 11$  odor pairs). (C3): similar to (C2) except bottom:  $\Delta D_{KL}$  (mean  $\pm$  SD,  $n = 18$  odor  
963 pairs).

964 (D). Similar to (C) but for timing differences in G2 or G3 by  $\Delta t = 15ms$ . In the schematics, the boxes  
965 for G1, G2 or G3 are overlapping but the staggered rectangles shift by  $\Delta t$ .

966 (E): Cumulative  $D_{KL}$  over a sniff cycle to quantify the total amount of information in PCx for odor  
967 pairs differing in the identity of single glomerulus (data in (B) and (C)) Identity difference in G1, G2  
968 or G3 is denoted by different shapes. The cumulative  $D_{KL}$  for feedback ON is above the utility line  
969 (dotted), revealing that centrifugal feedback enhances odor information regardless of the identity  
970 difference in either the earliest or later glomerulus.

971 (F): Similar to (E) but for odor pairs differing in the activation timing of single glomerulus (data in  
972 (D)). Centrifugal feedback enhances odor information regardless of the timing difference in either  
973 the earliest or later glomerulus.

974 (G). Similar to (E) but for odor pairs with a combination of identity difference and timing difference  
975 in one or multiple glomeruli. Each circle denotes one odor pair, and the color represents the  
976 pairwise correlation between the two odors, thus similarity. Across all odor similarity, Centrifugal  
977 feedback enhances odor information encoded in PCx.

978

979

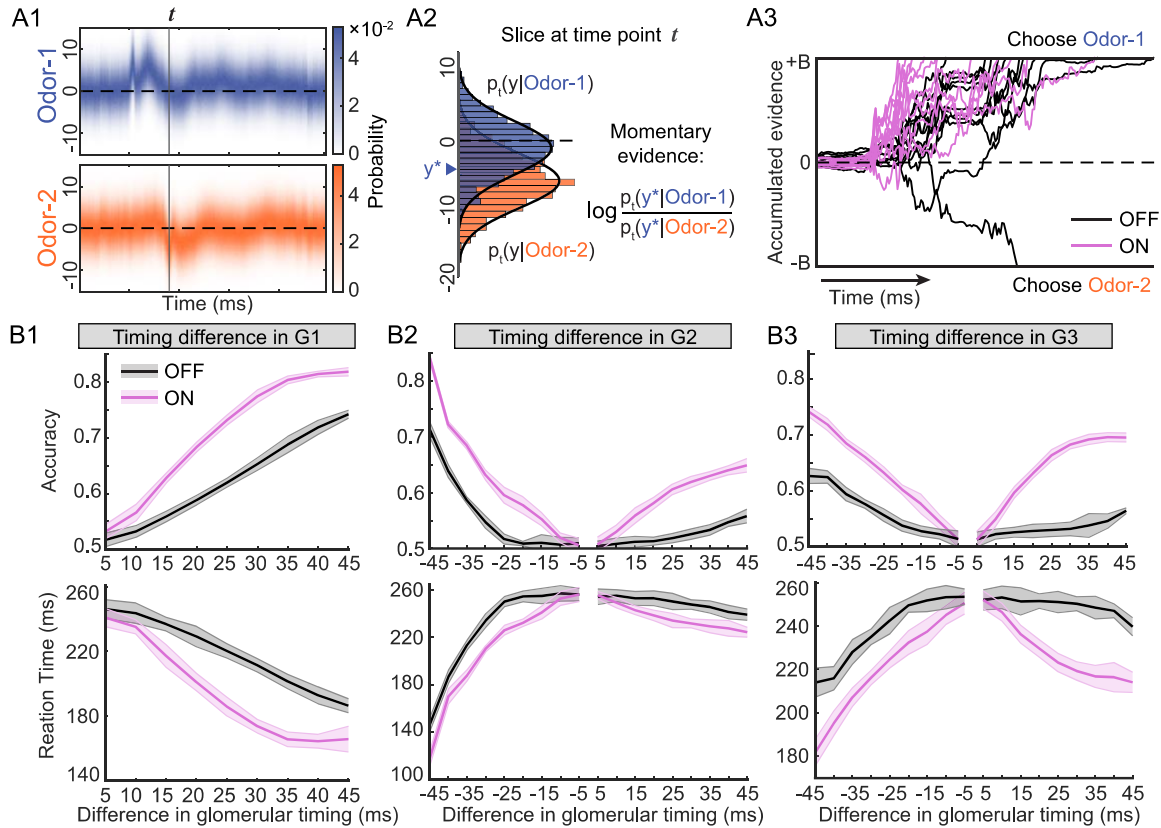

980

981 **Figure 7. Centrifugal feedback improves behavioral performance in odor discrimination.**

982 (A). Decision making modelled as an evidence accumulation process according to SPRT. (A1): the  
 983 time-varying probability distribution of piriform cell (PC) responses to two example odors which  
 984 differ only in activation timing of G1 by 35ms. (A2): the distributions sliced at  $t = 70ms$  in (A1). A  
 985 sample  $y^*$  is generated by the distribution of Odor-1 (assuming Odor-1 is presented). The  
 986 momentary evidence at this time step is calculated by the log likelihood ratio of the sample. (A3):  
 987 example traces of the accumulated evidence over time for centrifugal feedback ON or OFF. A  
 988 decision is made when the threshold  $\pm B$  is reached. Otherwise, a choice is made by chance at the  
 989 end of the sniff.

990 (B). The accuracy and reaction time as a function of the timing differences in glomerular activation  
 991 (mean  $\pm$  SD,  $n = 10$  agents). (B1): timing differences in G1 activation. (Odor-1, G1: 40ms, G2:  
 992 86ms, G3: 177ms; Odor-2, G1: 40ms +  $\Delta t$ , G2/G3: same as Odor-1). (B2): timing differences in G2  
 993 activation. (Odor-1, G1: 40ms, G2: 78ms, G3: 113ms; Odor-2, G2: 78ms  $\pm \Delta t$ , G1/G3: same as  
 994 Odor-1). (B3): timing differences in G3 activation. (Odor-1, G1: 54ms, G2: 81ms, G3: 120ms; Odor-  
 995 2, G3: 120ms  $\pm \Delta t$ , G1/G2: same as Odor-1).

996

997 **STAR Methods**

998 **RESOURCE AVAILABILITY**

999 **Lead contact**

1000 Further information and requests for resources and reagents should be directed to  
1001 and will be fulfilled by the Lead Contact, Krishnan Padmanabhan  
1002 (krishnan\_padmanabhan@urmc.rochester.edu).

1003 **Materials availability**

1004 This study did not generate new unique reagents.

1005 **Data and code availability**

- 1006
- 1007 • Model odors defined in this paper and other simulation results are publicly  
1008 available as of the date of publication. The DOI is listed in the key resources  
table.
  - 1009 • All original code is publicly available as of the date of publication. DOIs are  
1010 listed in the key resources table.
  - 1011 • Any additional information required to reanalyze the data reported in this  
1012 paper is available from the lead contact upon request.
- 1013

1014 **METHOD DETAILS**

1015 **Organization and architecture of the model**

1016 The MOB consisted of 50 glomeruli (G) corresponding to the olfactory  
1017 receptor neuron (ORN) inputs into the MOB (Mombaerts et al., 1996). Each  
1018 glomerulus was connected to 25 mitral/tufted (M/T) cells for a total 1250 M/T cells.  
1019 Within the MOB, a local population of 12,500 inhibitory granule cells (GCs) formed  
1020 reciprocal and lateral inhibitory connections with M/T cells. Individual M/T cell  
1021 “projections” formed random excitatory connections with 10,000 piriform cortical  
1022 cells (PCs) in PCx. These PCs in turn “projected” back to the olfactory bulb,  
1023 provided excitatory centrifugal feedback (thick lines in Fig.1A) onto the inhibitory  
1024 granule cells in the bulb. Within PCx, two types of inhibitory interneurons were  
1025 included: a population of 1250 feedforward inhibitory neurons (FFIs) that received  
1026 excitatory input from M/T cells and inhibited both PCs and other FFIs, and a  
1027 population of 1250 local feedback inhibitory neurons (FBIs) that received input  
1028 from a random subset of PCs and subsequently inhibited PCs and other FBIs.

1029 **Voltage dynamics of individual neurons**

1030 The voltage dynamics of individual cells in the network are modeled as spiking  
1031 neurons (Izhikevich, 2003) described by a two-dimensional (2D) system of ordinary  
1032 differential equations of the form,

1033 
$$\frac{dv}{dt} = 0.04v^2 + 5v + 140 - u + I$$

1034 
$$\frac{du}{dt} = a(bv - u)$$
 (1)

1034 with the after-spiking resetting

1035 
$$\text{if } v \geq 30mV, \text{ then } v \leftarrow c, u \leftarrow u + d$$
 (2)

1036 Here  $v$  represents the voltage (mV) of the neuron and  $u$  represents a  
 1037 dimensionless membrane recovery variable accounting for the activation or  
 1038 inactivation of ionic currents;  $t$  is time and has unit of  $ms$ ;  $a, b, c$  and  $d$  are the  
 1039 parameters by tuning which various firing patterns can be generated;  $I$  represents  
 1040 synaptic currents or injected dc-currents to the neuron.

1041 We choose to use this neuron model to simulate the voltage dynamics of  
 1042 individual neurons because: 1). It combines the biological plausibility of the  
 1043 Hodgkin–Huxley neuron model and the computational efficiency of leaky integrate-  
 1044 and-fire neuron model, allowing us to simulate tens of thousands of spiking  
 1045 neurons simultaneously in our network; 2). Different combinations of the parameter  
 1046 values  $a, b, c$  and  $d$  can reproduce a diversity of firing patterns of neurons of known  
 1047 types, so we can capture the biophysical diversity in the firing properties for  
 1048 different types of neurons in olfactory system, such as the mitral/tufted (M/T) cells  
 1049 and granule cells in the main olfactory bulb (MOB), and piriform cortical cells and  
 1050 other local inhibitory interneurons in piriform cortex (PCx). In order to achieve  
 1051 heterogeneity such that different cells within the same type exhibit different  
 1052 dynamics, we introduced randomness in the parameter assignment (see Table-1).  
 1053 The  $r_i$  is a random variable uniformly distributed on the interval  $[0,1]$  and  $i$  denotes  
 1054 the neuron index. For example, the parameter  $a$  will be distributed on the interval  
 1055  $[0.02, 0.1]$  within which various firing patterns can emerge. We also used  $r_i^2$  or  $r_i^4$   
 1056 to bias the distribution to different extent for different cell types. Within the same  
 1057 cell type, the parameters span a wide range of values to achieve heterogeneity in  
 1058 cell dynamics.

1059 **Table-1 Parameters of Izhikevich neuron model for different cell types**

|     | <b>M/T cells</b>  | <b>GCs</b>        | <b>PCs</b>       | <b>FFIs/FBIs</b>  |
|-----|-------------------|-------------------|------------------|-------------------|
| $a$ | $0.1 - 0.08r_i^4$ | $0.1 - 0.08r_i^2$ | $0.02 + 0.08r_i$ | $0.1 - 0.08r_i^2$ |
| $b$ | 0.2               | 0.2               | 0.2              | 0.2               |
| $c$ | -65               | $-65 + 15r_i^2$   | -65              | $-65 + 15r_i^2$   |
| $d$ | $2 + 6r_i^4$      | 2                 | $8 - 6r_i$       | 2                 |

1060

1061 Synaptic input  $I$  to each neuron depends on the neuron type. For a cell  $i$  in  
 1062 MOB,  $I_i$  is a linear superposition of various sources

1063 
$$I_i = I_i^{mc-ex} + I_i^{gc-in} + I_i^{osn} + I_i^{feedback} + \xi_i$$
 (3)

1064 Here,  $I_i^{mc-ex}$  represents excitation from M/T cells and exists for both M/T cells and  
1065 GCs. For GCs, when a M/T cells fires, the excitatory post-synaptic current (EPSC)  
1066  $I_i^{mc-ex}$  into different GCs are delayed by different latencies, resulting in different  
1067 spiking latencies of GCs (Fig.S1), consistent with previous experimental findings  
1068 in the olfactory bulb granule cell network (Kapoor and Urban, 2006). The  $I_i^{gc-in}$   
1069 represents inhibition from GCs and exists for both M/T cells and GCs.  $I_i^{osn}$   
1070 represents glomerular input and only exists for M/T cells. When a glomerulus is  
1071 activated by a model odor, it provides correlated inputs  $I_i^{osn}$  to the M/T cells driven  
1072 by that glomerulus (Fig.S2).  $I_i^{feedback}$  represents excitatory centrifugal input from  
1073 piriform cells and is non-zero only for GCs when feedback is ON. We set it to zero  
1074 for all GCs when feedback is OFF. The  $\xi_i$  represents Gaussian white noise input  
1075 with zero mean and standard deviation  $\sigma = 1.75$  for M/T cells and  $\sigma = 0.8$  for GCs.

1076 Similarly, for a cell  $i$  in PCx,  $I_i$  is composed of

$$1077 \quad I_i = I_i^{mob} + I_i^{pc-ex} + I_i^{in} + \eta_i \quad (4)$$

1078 where  $I_i^{mob}$  represents input from M/T cells in MOB and only exists for piriform  
1079 cortical cells (PCs) and feedforward inhibitory neurons (FFIs);  $I_i^{pc-ex}$  represents  
1080 excitation from PCs and exists for both PCs and feedback inhibitory neurons  
1081 (FBIs);  $I_i^{in}$  represents inhibition from local inhibitory neurons including FFIs and  
1082 FBIs;  $\eta_i$  represents Gaussian white noise input (zero mean and standard deviation  
1083  $\sigma = 0.9$ ) and only exists for PCs.

1084 Each action potential fired by a presynaptic neuron will evoke a jump in the  
1085 corresponding synaptic inputs of all its postsynaptic targets by an amount equal to  
1086 the appropriate synaptic strength. For example, action potentials of a M/T cell  
1087 induce jumps in the excitatory currents of their postsynaptic target neurons,  
1088 including  $I_i^{mc-ex}$  in M/T cells and GCs in MOB, and  $I_i^{mob}$  in FFIs and PCs in PCx.  
1089 These synaptic inputs then decay to zero with time constant  $10ms$ . The height of  
1090 the jump is determined by the pairwise synaptic strength between any two neurons  
1091 and their values are given in the synaptic weight matrix which will be described in the  
1092 next section.

## 1093 **Synaptic strength and model network architecture**

1094 The MOB consists of 50 glomeruli, each of which drives 25 M/T cells, thus a total  
1095 1250 M/T cells in MOB. Besides, a local population of 12,500 inhibitory GCs  
1096 formed reciprocal and lateral inhibitory connections with M/T cells. Thus, within  
1097 the MOB, we have a weight matrix  $\mathbf{W}_{mob}$  of 13,750 by 13,750 with its entry  $W_{mob}^{ij}$   
1098 representing the synaptic strength from presynaptic neuron  $j$  to postsynaptic  
1099 neuron  $i$ . Depending on the cell type, this matrix  $\mathbf{W}_{mob}$  can be partitioned into four  
1100 sub-matrices, i.e., from M/T cell to M/T cell, from M/T cell to GC, from GC to M/T  
1101 cell and from GC to GC. The specific value of each entry in  $\mathbf{W}_{mob}$  was assigned  
1102 randomly according to two parameters we chose for each sub-matrix. One is the



1103 connection density (the percentage of non-zero synaptic weights) and the other is  
 1104 the average synaptic strength (mean of a uniform distribution from which individual  
 1105 synaptic weights are sampled). Each sub-matrix has its own value of the  
 1106 connection density and average synaptic strength. In particular, the connection  
 1107 density and average synaptic strength between M/T cells driven by the same  
 1108 glomerulus are higher than between M/T cells driven by different glomeruli.

1109 Individual M/T cell “projections” form random excitatory connections with  
 1110 10,000 PCs and 1250 FFIs in PCx, giving rise to a feedforward weight matrix  $\mathbf{W}_{ff}$   
 1111 of 11,250 by 1250. Within PCx, PCs form recurrent excitations with each other.  
 1112 The FFIs inhibit both PCs and other FFIs, and another population of 1250 FBIs  
 1113 that receive input from a random subset of PCs inhibit PCs and other FBIs.  
 1114 Therefore, we have a matrix  $\mathbf{W}_{pcx}$  of 12,500 by 12,500 that identifies all synaptic  
 1115 weights between cells in PCx. PCs “project” back to the MOB, providing excitatory  
 1116 centrifugal feedback to GCs, giving rise to a feedback weight matrix  $\mathbf{W}_{fb}$  of 12,500  
 1117 by 10,000. Under the condition of centrifugal feedback OFF, this  $\mathbf{W}_{fb}$  is set to be  
 1118 a zero matrix. The connection density and average synaptic strength for all sub-  
 1119 matrices can be found in Table-2.

1120 **Table-2 Network parameters controlling the connectivity between cell types**

|                          | Connection density | Average synaptic strength |
|--------------------------|--------------------|---------------------------|
| MCtoMC (same glomerulus) | 0.8                | 0.25                      |
| MC2GC                    | 0.3                | 0.25                      |
| GC2MC                    | 0.02               | -0.4                      |
| GC2GC                    | 0.05               | -0.1                      |
| MC2PC                    | 0.5                | 0.06                      |
| MC2FFI                   | 0.2                | 0.2                       |
| PC2GC                    | 0.9                | 0.03                      |
| PC2PC                    | 0.01               | 0.1                       |
| FFI2PC                   | 0.1                | -0.1                      |
| FBI2PC                   | 0.8                | -0.1                      |
| FFI2FFI                  | 0.01               | -1.0                      |
| PC2FBI                   | 0.02               | 0.3                       |
| FBI2FBI                  | 0.02               | -0.5                      |

1121

## 1122 **Model odor definition**

1123 Model odors are defined by the combinatorial patterns of glomeruli which are  
 1124 activated successively with different glomerular timing, a pattern recapitulating the  
 1125 spatiotemporal structure of odor inputs (Rubin and Katz, 1999; Meister and  
 1126 Bonhoeffer, 2001). Specifically, when a model odor is presented, three glomeruli  
 1127 will be activated (6% of all glomeruli) and all the M/T cells associated with those  
 1128 glomeruli will receive correlated glomerular input  $I^{osn}$  which lasts for 90ms (Fig.1B

1129 and Fig.S2). A table of 300 model odors were defined as the odor inputs to our  
1130 network Fig.S2).

### 1131 **Network dynamics simulation**

1132 The network dynamics are governed by a large set of differential equations of the  
1133 form Eqn.(1) coupled by the pairwise synaptic weights between different neurons.  
1134 These equations were numerically solved using the first-order Euler's method with  
1135 a uniform step size  $\Delta t = 1ms$ . The initial conditions were obtained by first running  
1136 the network without glomerular input ( $I_i^{osn} = 0$ ) but only with noisy input ( $\xi_i$  and  $\eta_i$ )  
1137 for  $600ms$ . This allowed the network to reach a steady state determined by its  
1138 intrinsic dynamics. Afterwards we simulated the network using model odors for  
1139  $250ms$  which is roughly the duration of one sniff cycle. The network spiking activity  
1140 within this period were used for later analysis.

### 1141 **Balance between excitatory and inhibitory synaptic inputs**

1142 To understand the balance between excitatory and inhibitory synaptic inputs for  
1143 MOB cells, we computed the overall amount of excitatory and all inhibitory inputs  
1144 to each cell. The excitatory sources for M/T cells include the recurrent MC  
1145 excitations  $I_i^{mc-ex}$ ; for GCs they include excitation from M/T cells  $I_i^{mc-ex}$  and  
1146 excitatory feedback input  $I_i^{feedback}$  when centrifugal feedback is turned ON. The  
1147 inhibitory source for both M/T cells and GCs is the  $I_i^{gc-in}$ . For each MOB cell, the  
1148 areas under the excitatory and inhibitory synaptic inputs averaged over 10 trials  
1149 are computed respectively and an algebraic sum of the two are taken. This value,  
1150 as referred to E/I balance in Fig.3C and Fig.3D, was a measurement of the overall  
1151 driving effect of the excitatory and inhibitory inputs on each cell during a sniff.  
1152 Positive (negative) values for a cell indicated that it was dominated by excitation  
1153 (inhibition) and a zero simply corresponded to a balance.

### 1154 **Principal component analysis (PCA)**

1155 Spiking activity of each piriform cells (PCs) was binned into a  $5ms$  sliding time  
1156 window and averaged across trials (each model odor was presented in 10 trials).  
1157 To perform the PCA analysis, we first concatenated the responses of all piriform  
1158 cell (PCs) to all 300 model odors under both conditions of feedback OFF and ON,  
1159 resulting in a matrix of 10,000 PCs by 247 time bins  $\times$  300 odors  $\times$  2 conditions .  
1160 Response covariance matrices ( 10,000 by 10,000 ) were computed for this  
1161 concatenated matrix (after subtracting the mean responses). This gave us a single  
1162 set of eigenvectors, thus the same eigenspace into which PC responses for both  
1163 feedback OFF and ON can be projected and compared. Each 10,000-dimensional  
1164 PC response vector was then projected onto the first 3 principal eigenvectors for  
1165 visualization (Fig.5) and the first 50 principal eigenvectors for computations (Fig.6  
1166 and Fig.S5).

### 1167 **Kullback–Leibler divergence $D_{KL}$**

1168 To quantitatively assess the effect of centrifugal feedback on odor processing in the  
1169 PCx, we computed the instantaneous Kullback–Leibler divergence  $D_{KL}$  for each  
1170 odor pair presented. We used three types of odor pairs: 1). odor pairs with identity  
1171 differences in a single glomerulus (19 pairs in G1, 11 pairs in G2 and 18 pairs in  
1172 G3); 2). odor pairs with timing differences in a single glomerulus (19 pairs in G1,  
1173 11 pairs in G2 and 18 pairs in G3); 3). odor pairs with both identity and timing  
1174 differences in multiple glomeruli (192 pairs in total with different correlations in  
1175 latency).

1176 For a given odor pair, each of the odors was presented for 100 trials and  
1177 the responses of PCs were recorded and then projected to the first 50 principal  
1178 eigenvectors. At each time step, the PC responses to each odor gave rise to a  
1179 cluster of points in the 50-dimensional space, with each point in the cluster  
1180 corresponding to a single-trial response. The separation between the two clusters  
1181 at time  $t$  were computed using the Kullback–Leibler divergence  $D_{KL}(t)$  between  
1182 the distributions of the two clusters along the optimal readout dimension  $\gamma_t$   
1183 (Fig.6A), which was computed from multiplying the inverse covariance matrix  $\Sigma_t^{-1}$   
1184 (50 by 50) of the two clusters with the vector connecting the cluster means  $\Delta\mu_t$   
1185 (50 by 1). Note that since the PC responses evolved over time, the clusters of  
1186 points and thus the optimal readout dimension  $\gamma_t$  (as well as  $\Sigma_t^{-1}$  and  $\Delta\mu_t$ ) also  
1187 varied with time. Therefore the  $D_{KL}(t)$  was a function of time (Fig.6).

1188 Standard Kullback–Leibler divergence is not symmetric therefore depends  
1189 on the order of the two distributions. To correct that, we therefore symmetrized it  
1190 by computing (Masuda and Doiron, 2007)

$$1191 \quad D_{KL}(t) = \frac{KL_t(O1||O2) \cdot KL_t(O2||O1)}{KL_t(O1||O2) + KL_t(O2||O1)} \quad (5)$$

1192 where O1 and O2 represent Odor-1 and Odor-2, and

$$1193 \quad KL_t(O1||O2) = \sum_y P_t(y|Odor-1) \log \frac{P_t(y|Odor-1)}{P_t(y|Odor-2)} \quad (6)$$

1194 is the standard Kullback–Leibler divergence between the distribution  $P_t(y|Odor-1)$   
1195 and  $P_t(y|Odor-2)$ , which are built from those single-trial PC responses to the  
1196 two odors at time step  $t$ . We computed the  $D_{KL}(t)$  for feedback OFF and ON using  
1197 the same procedure described above. Accumulated  $D_{KL}(t)$  (Fig.6E-Fig.6G) was  
1198 computed as the area under mean  $D_{KL}(t)$  over a sniff cycle.

### 1199 **Sequential probability ratio test (SPRT)**

1200 To make predictions on animal's behavioral performance under the condition of  
1201 feedback OFF or ON, we applied the sequential probability ratio test (Gold and  
1202 Shadlen, 2007) and simulated the decision-making process of a model agent in a  
1203 two-alternative forced-choice (2AFC) task. In such a task, on each trial, the model  
1204 agent was presented with a randomly chosen odor (Odor-1 or Odor-2) and was  
1205 required to respond which odor was presented by the end of a single sniff. We

1206 chose three different model odors as the original odor (Odor-1) from the table of  
1207 300 model odors we defined. We then shifted the activation timing of a single  
1208 glomerulus by  $5ms$  increment/decrement in the three original odors. Therefore,  
1209 the odor pairs here were composed of one original odor and its counterpart which  
1210 had the timing of the same glomerulus shifted by different amount of time (Fig.7).

1211 First, similar to the computation of  $D_{KL}(t)$ , for a given odor pair, each of the  
1212 odors was presented for 100 trials and at each time step, the two distributions  
1213  $P_t(y|Odor-1)$  and  $P_t(y|Odor-2)$  were obtained from the single-trial PC  
1214 responses along the optimal readout dimension. We then fit a normal distribution  
1215 to the two distributions respectively and we used the same standard deviation  $\sigma$   
1216 in the normal distribution for both odors, which allowed us to generate samples more  
1217 efficiently. According to SPRT, the agent's decision process was depicted as the  
1218 accumulation of noisy momentary evidence over time until a threshold was  
1219 reached, or the stimulus was extinguished. Supposing we generated a sample  $y^*$   
1220 at time step  $t$ , the momentary evidence was then computed as

$$1221 \quad ev(t) = \log \frac{\tilde{P}_t(y^*|Odor-1)}{\tilde{P}_t(y^*|Odor-2)} \quad (7)$$

1222 Here,  $\tilde{P}_t$  denoted the fitted normal distribution. A choice was made when the  
1223 accumulated evidence  $\sum_t ev(t)$  reached one of the decision boundaries  $\pm B_d$   
1224 (Fig.7A3) and the reaction time was recorded by adding a residual motor delay,  
1225 which was normally distributed with mean =  $50ms$  and std =  $5ms$ . We generated  
1226 1000 samples  $y^*$  at each time step for each model agent (10 agents in total).  
1227 Therefore, each agent performed 1000 trials for the same pair of odors. For each  
1228 agent, we computed the accuracy as the proportion of correct choices among the  
1229 1000 trials. The average reaction time across the 1000 trials was reported as the  
1230 reaction time for that agent. Parameter values used in SPRT analysis are listed in  
1231 Table-3.

1232 **Table-3 Parameters used in SRRT: boundary and noise level**

|          | G1   | G2 negative | G2 positive | G3 negative | G3 positive |
|----------|------|-------------|-------------|-------------|-------------|
| $B_d$    | 2.20 | 2.20        | 1.39        | 1.39        | 1.39        |
| $\sigma$ | 11   | 12          | 10          | 7.5         | 7.5         |

1233

## 1234 **QUANTIFICATION AND STATISTICAL ANALYSIS**

1235 Statistical tests for significance were performed with a two-sided Wilcoxon rank  
1236 sum test (ranksum function in MATLAB) when samples were independent (Fig.5A  
1237 and Fig.5B) and with a two-sided Wilcoxon signed rank test (signrank function in  
1238 MATLAB) for paired samples (Fig.4E1 and Fig.4E2). Correlation coefficients  
1239 between two variables were computed as the Pearson correlation coefficient  
1240 (corrcoef function in MATLAB). Statistical significance was defined by a p value <  
1241 0.05. The statistical details (correlation coefficient, p value, sample size n) are

1242 provided in the figures, figure legends, or the text of the Results section. The  
1243 specific meaning of the sample size  $n$  is clarified when used.
